# Supplementary material for: Tissue-specific changes in the RNA structurome mediate salinity response in Arabidopsis
Source: PubMed Central journal article supplement — RNA. 2020 Apr;26(4):492–511. doi: 10.1261/rna.072850.119 (PMC7075263; doi:10.1261/rna.072850.119), 2020-04
Supplement: supp_072850.119_Supplemental_Figure_13.pdf [file supp_072850.119_Supplemental_Figure_13.pdf]

A

Top 5% of  $\Delta$  Mean Reactivity (Root – Shoot)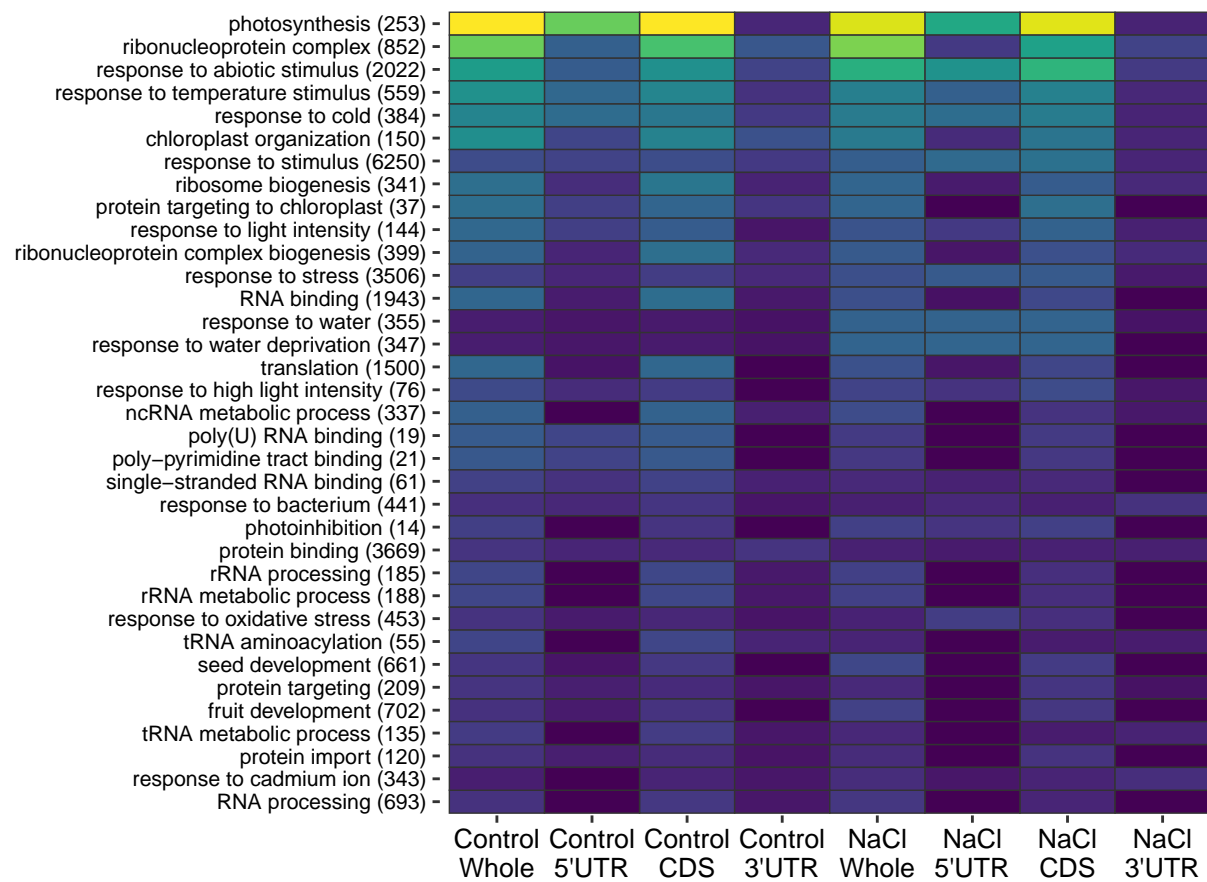

B

Bottom 5% of  $\Delta$  Mean Reactivity (Root – Shoot)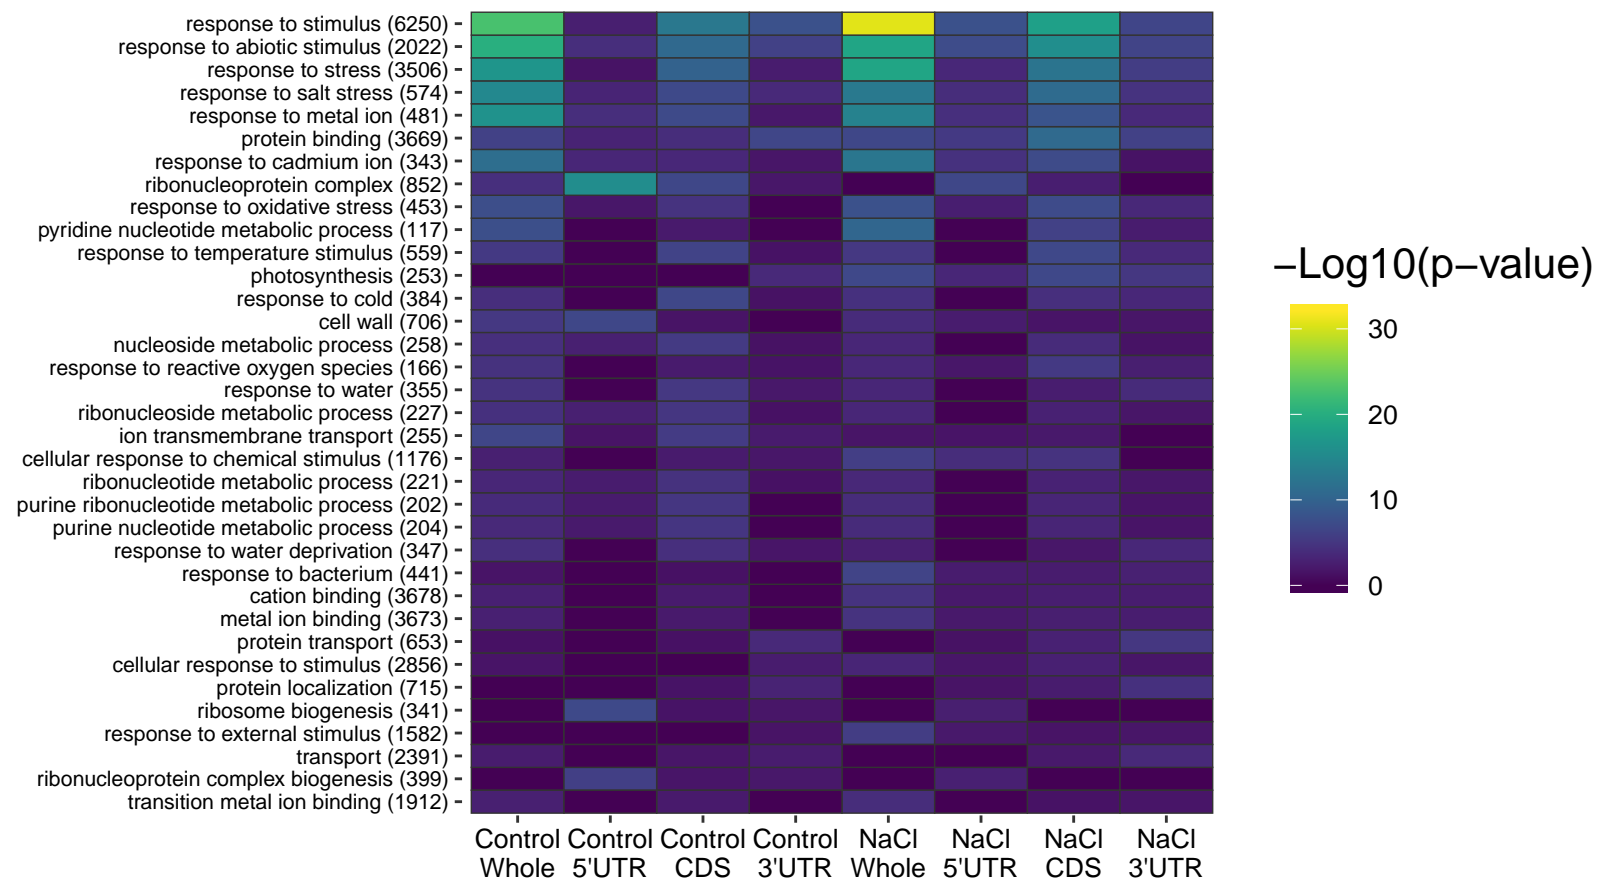 $-\text{Log}_{10}(\text{p-value})$ 

30

20

10

0
