# Supplementary material for: Tissue-specific changes in the RNA structurome mediate salinity response in Arabidopsis
Source: PubMed Central journal article supplement — RNA. 2020 Apr;26(4):492–511. doi: 10.1261/rna.072850.119 (PMC7075263; doi:10.1261/rna.072850.119), 2020-04
Supplement: supp_072850.119_Supplemental_Figure_16.pdf [file supp_072850.119_Supplemental_Figure_16.pdf]

| G | T | A | C | Shoot   |   |   |    |    |              |   |   |    |    | Root    |   |   |    |    |              |   |   |    |    | DMS treatment<br>Duration (min) |
|---|---|---|---|---------|---|---|----|----|--------------|---|---|----|----|---------|---|---|----|----|--------------|---|---|----|----|---------------------------------|
|   |   |   |   | Control |   |   |    |    | NaCl (100mM) |   |   |    |    | Control |   |   |    |    | NaCl (100mM) |   |   |    |    |                                 |
|   |   |   |   | -       | + | + | +  | +  | -            | + | + | +  | +  | -       | + | + | +  | +  | -            | + | + | +  | +  |                                 |
|   |   |   |   | 20      | 1 | 5 | 10 | 15 | 20           | 1 | 5 | 10 | 15 | 20      | 1 | 5 | 10 | 15 | 20           | 1 | 5 | 10 | 15 |                                 |

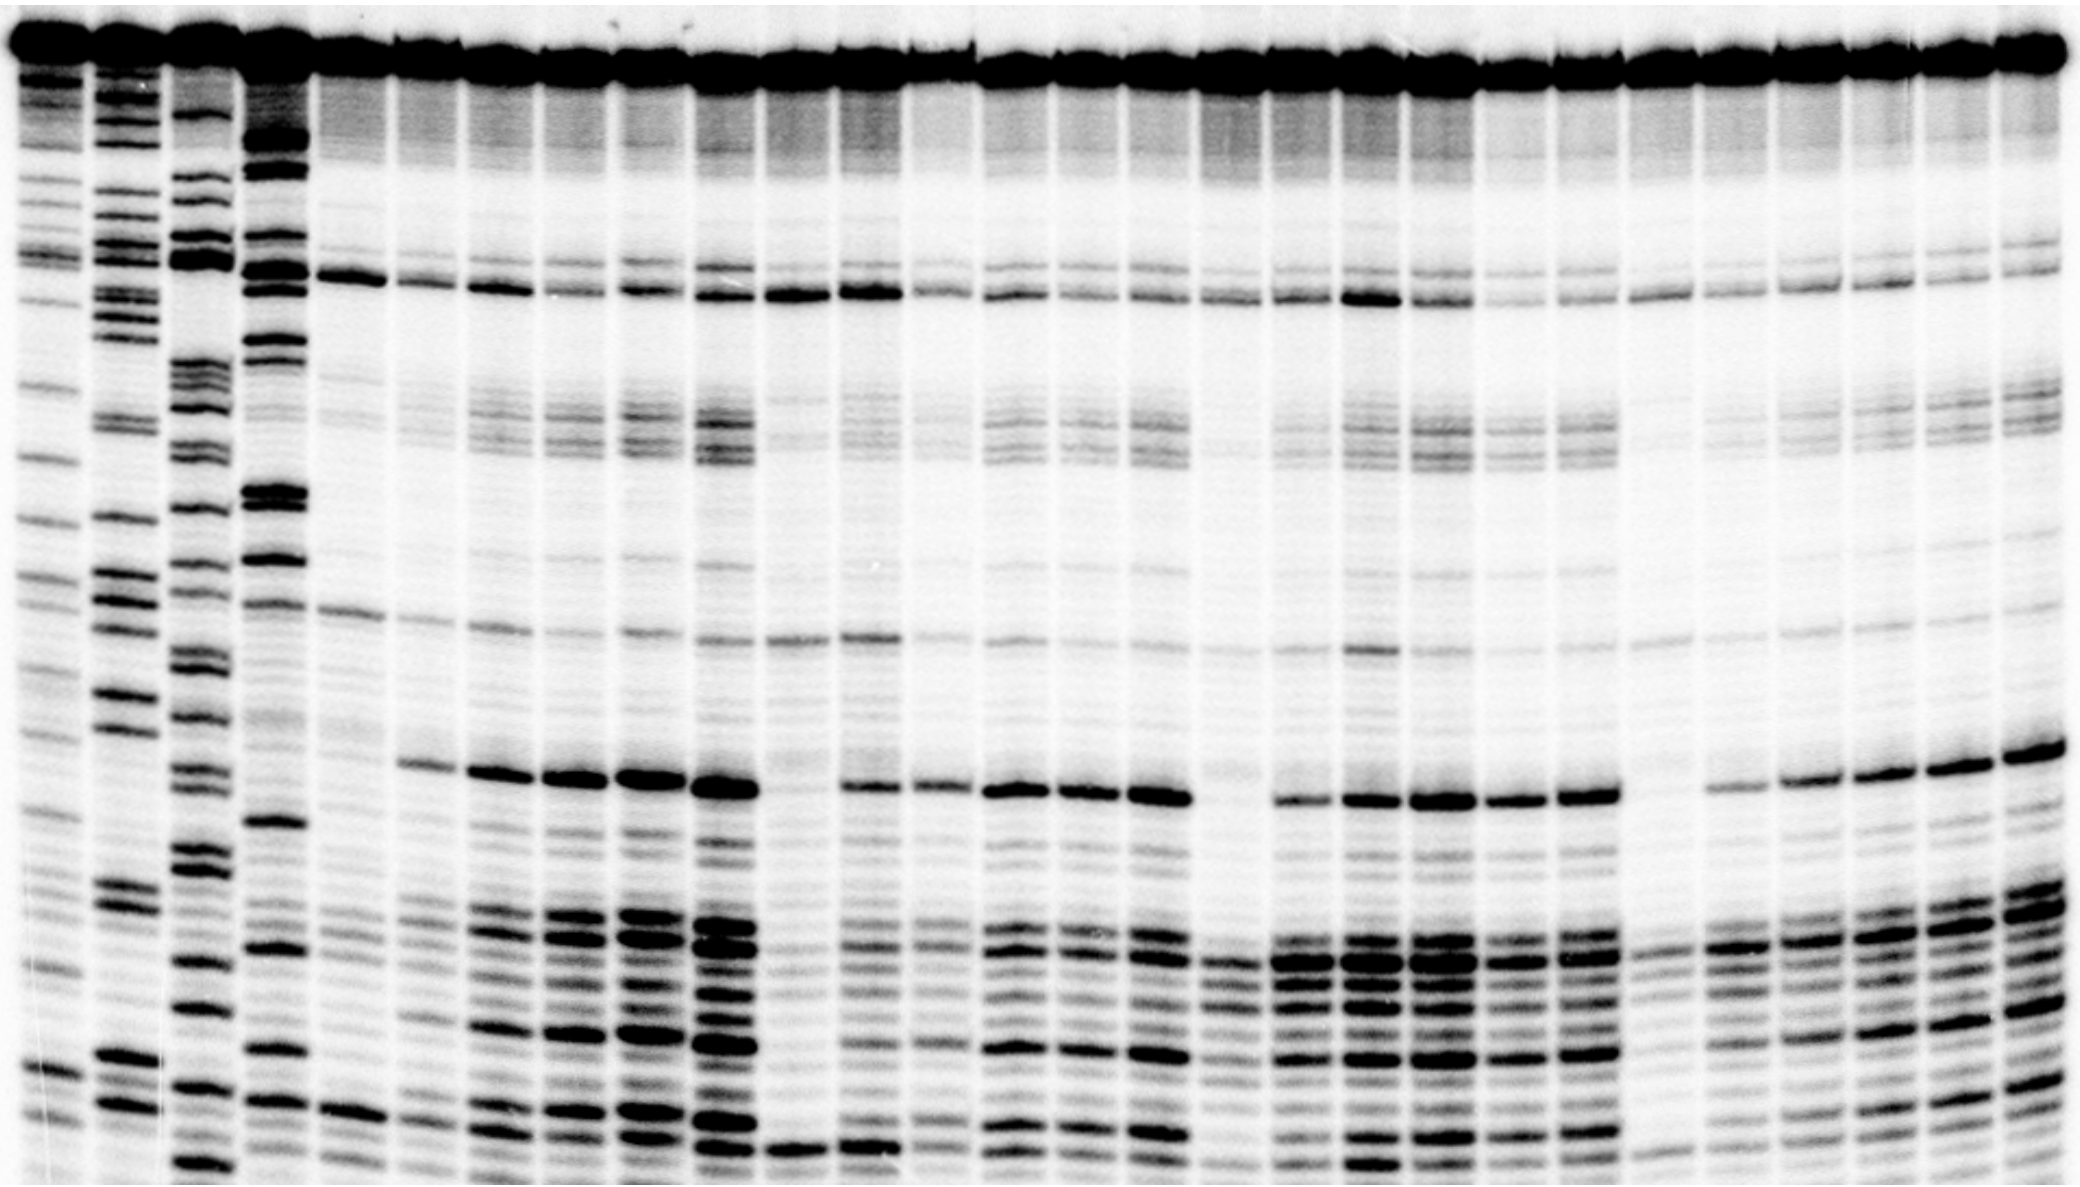

| Shoot Control |        |        |        |        | Shoot NaCl (100mM) |        |        |        |        | Root Control |        |        |        |        | Root NaCl (100mM) |        |        |        |        | Kinetics (%) |
|---------------|--------|--------|--------|--------|--------------------|--------|--------|--------|--------|--------------|--------|--------|--------|--------|-------------------|--------|--------|--------|--------|--------------|
| 20            | 1      | 5      | 10     | 15     | 20                 | 1      | 5      | 10     | 15     | 20           | 1      | 5      | 10     | 15     | 20                | 1      | 5      | 10     | 15     |              |
| 0.74%         | 12.42% | 21.09% | 31.27% | 35.96% | 5.33%              | 19.43% | 20.21% | 18.54% | 25.76% | 12.64%       | 21.53% | 26.69% | 35.29% | 37.32% | 9.28%             | 14.61% | 25.68% | 29.37% | 32.20% |              |
