# Supplementary material for: Tissue-specific changes in the RNA structurome mediate salinity response in Arabidopsis
Source: PubMed Central journal article supplement — RNA. 2020 Apr;26(4):492–511. doi: 10.1261/rna.072850.119 (PMC7075263; doi:10.1261/rna.072850.119), 2020-04
Supplement: supp_072850.119_Supplemental_Refs.pdf [file supp_072850.119_Supplemental_Refs.pdf]

### Supplementary Information References

1. Li, F. *et al.* Regulatory Impact of RNA Secondary Structure across the Arabidopsis Transcriptome. *The Plant Cell* **24**, 4346–4359 (2012).
2. Tian, T. *et al.* agriGO v2.0: a GO analysis toolkit for the agricultural community, 2017 update. *Nucleic Acids Research* **45**, (2017).
3. Anderson, S. J. *et al.* N<sup>6</sup>-Methyladenosine Inhibits Local Ribonucleolytic Cleavage to Stabilize mRNAs in Arabidopsis. *Cell Reports* **25**, (2018).
4. Spitale, R. C. *et al.* Structural imprints in vivo decode RNA regulatory mechanisms. *Nature* **519**, 486–490 (2015).
