# Supplementary figures and images for: Tissue-specific changes in the RNA structurome mediate salinity response in Arabidopsis
Source: PubMed Central journal article supplement — RNA. 2020 Apr;26(4):492–511. doi: 10.1261/rna.072850.119 (PMC7075263; doi:10.1261/rna.072850.119), 2020-04

Shoot Control  
n = 16,716

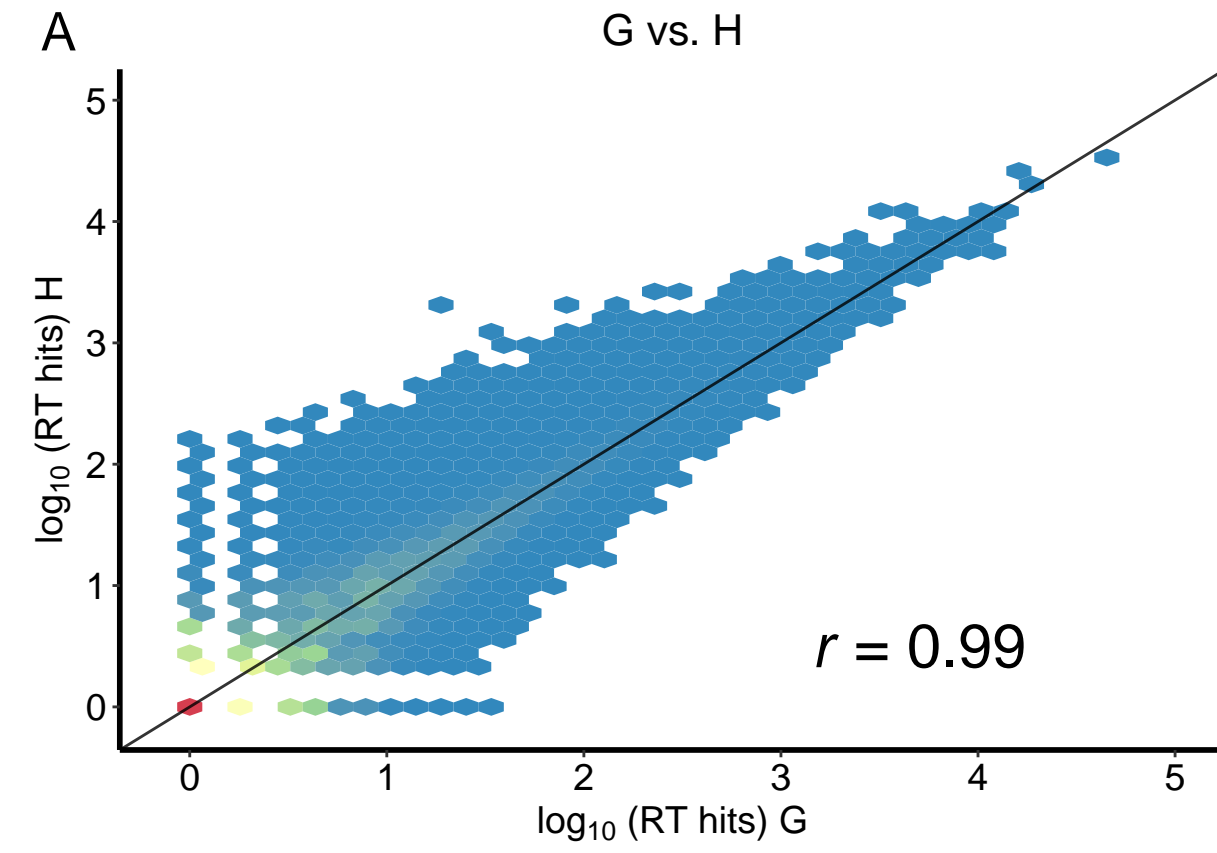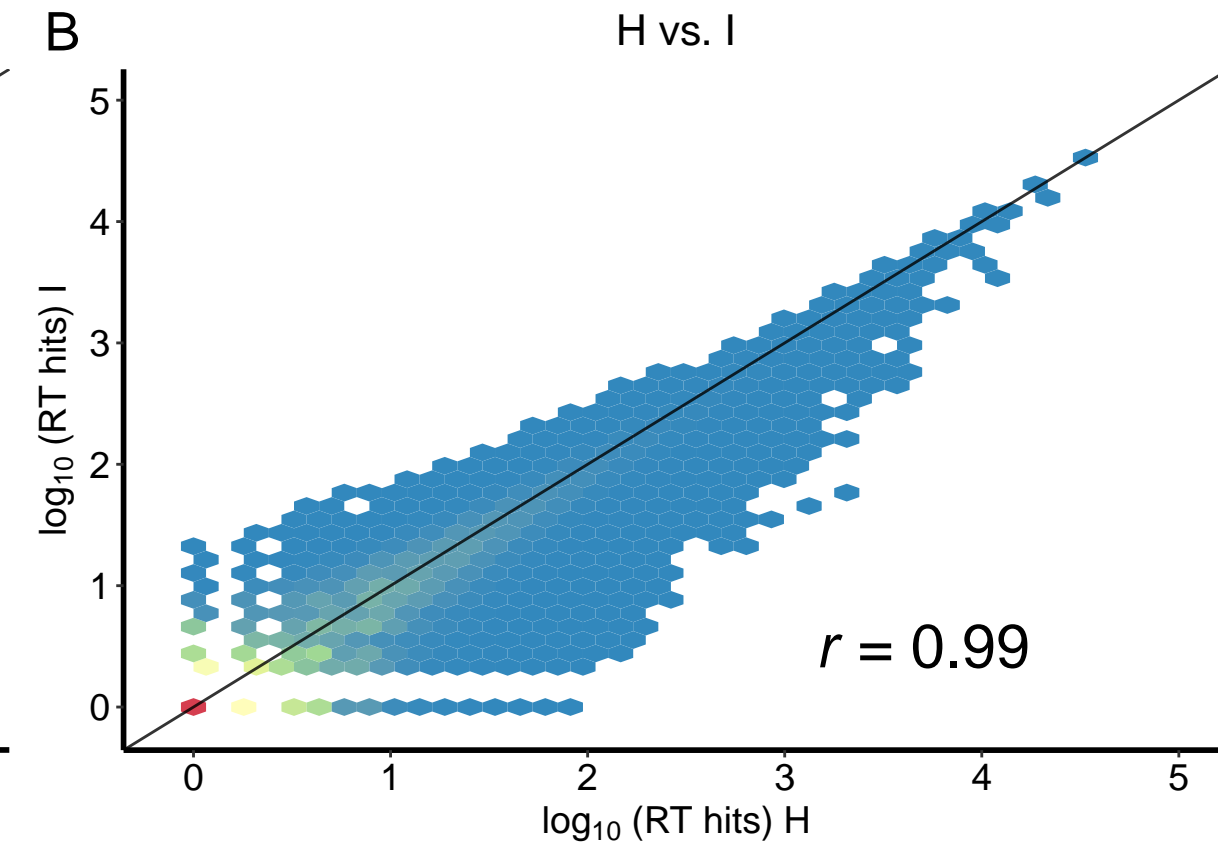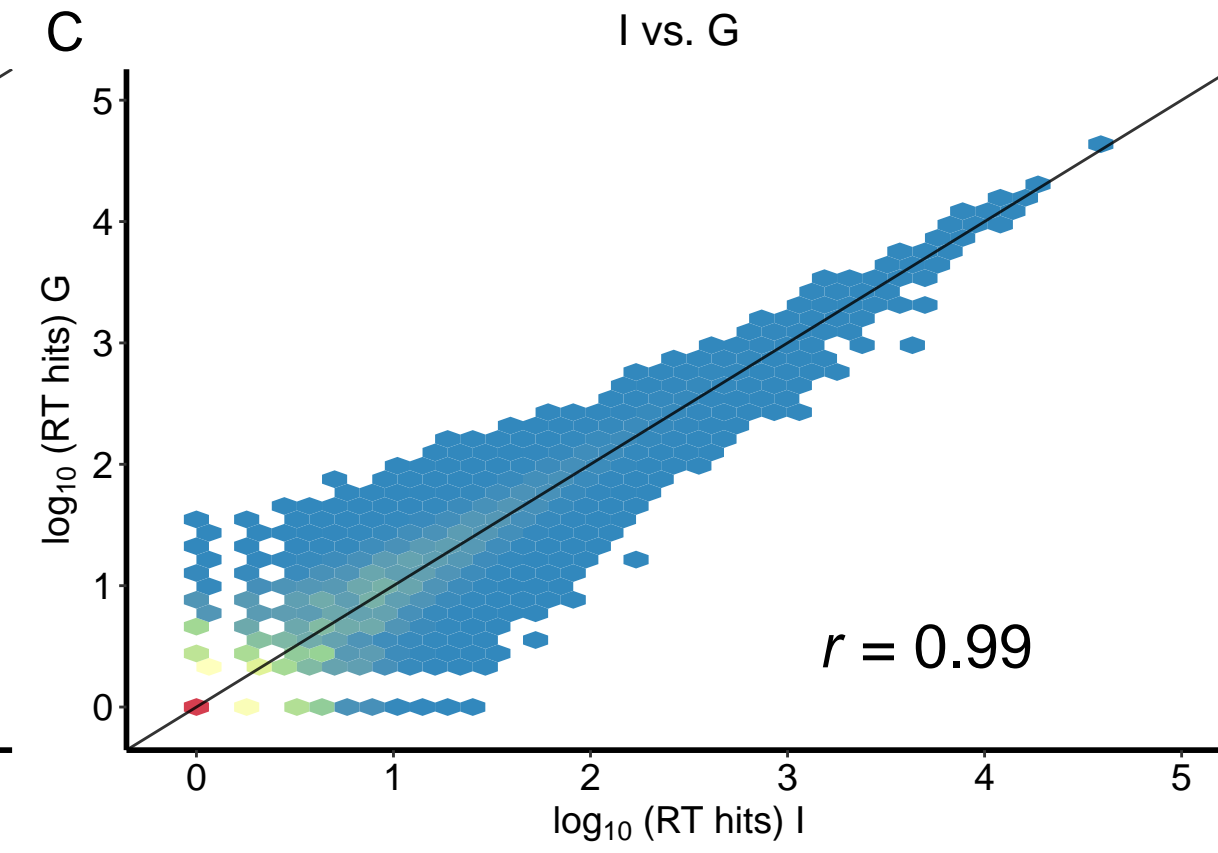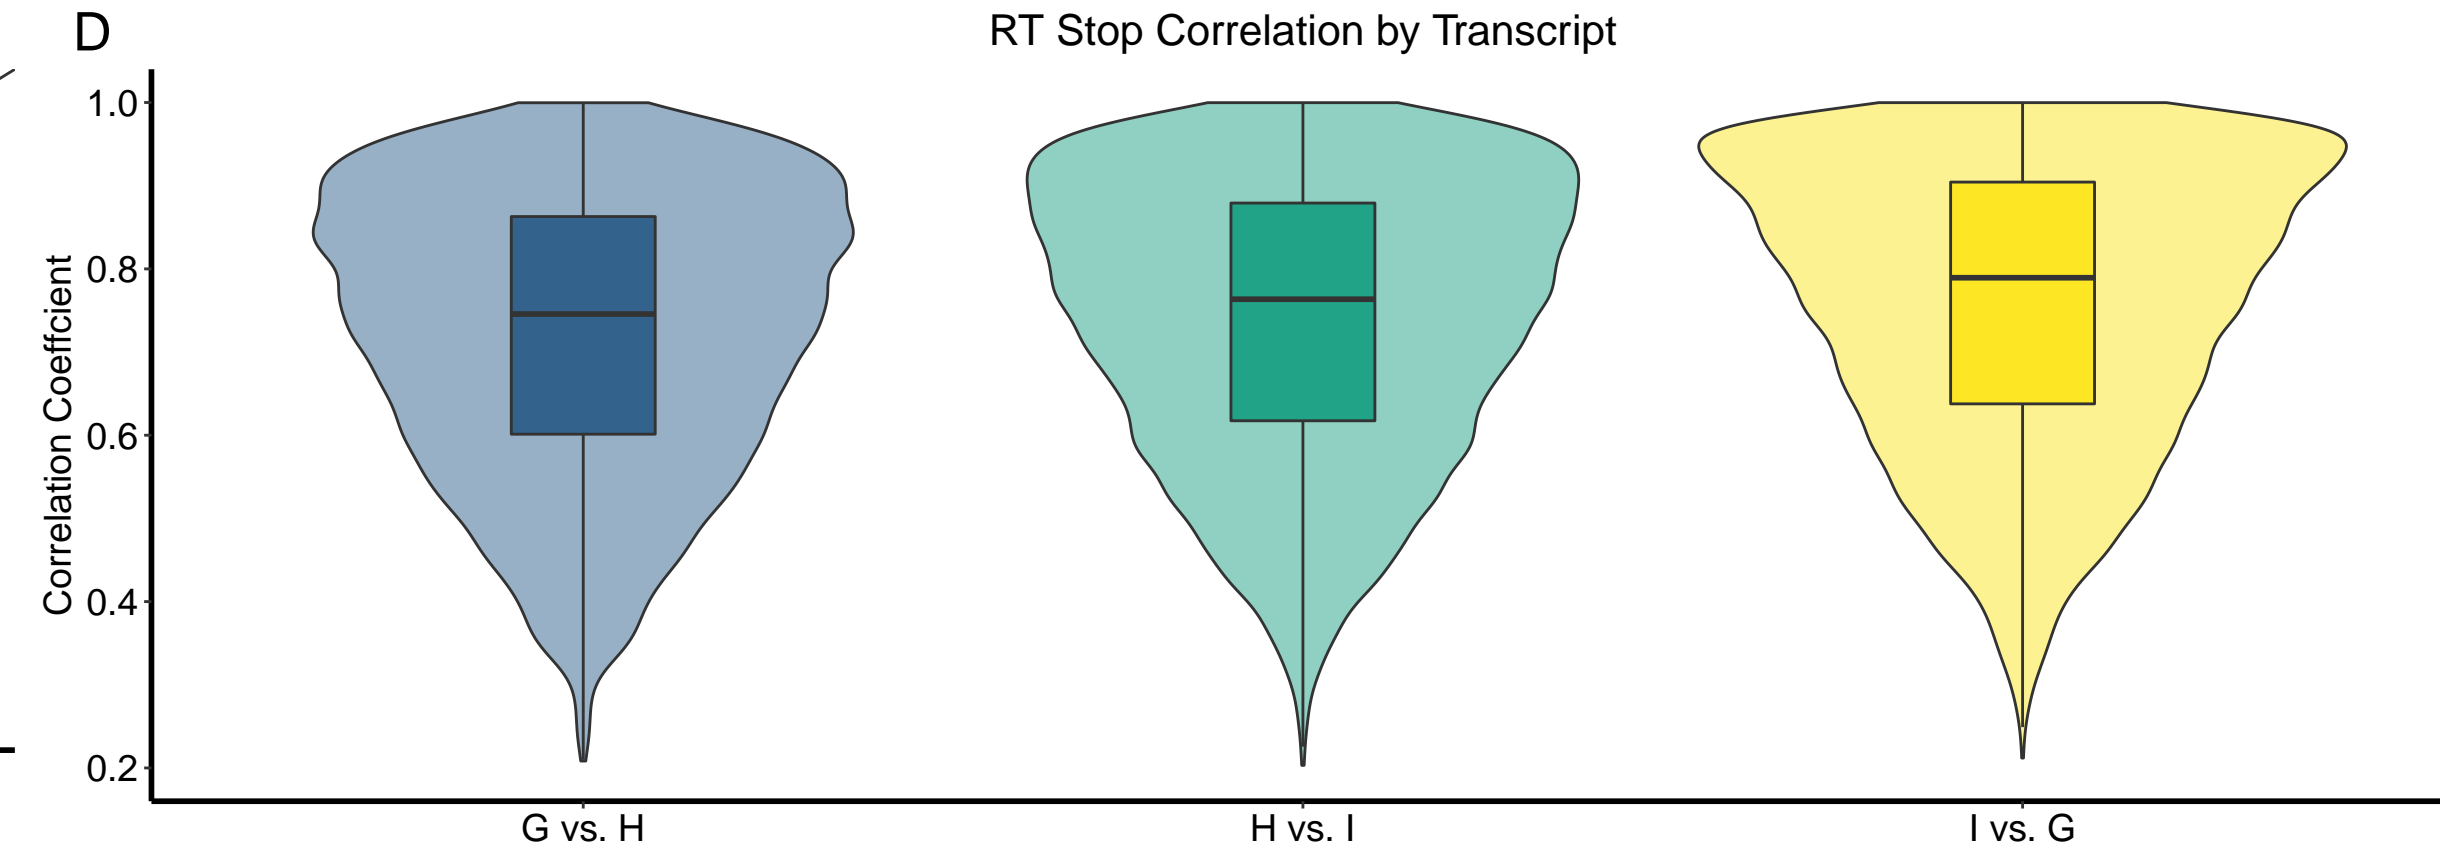

Shoot Salt  
n = 16,890

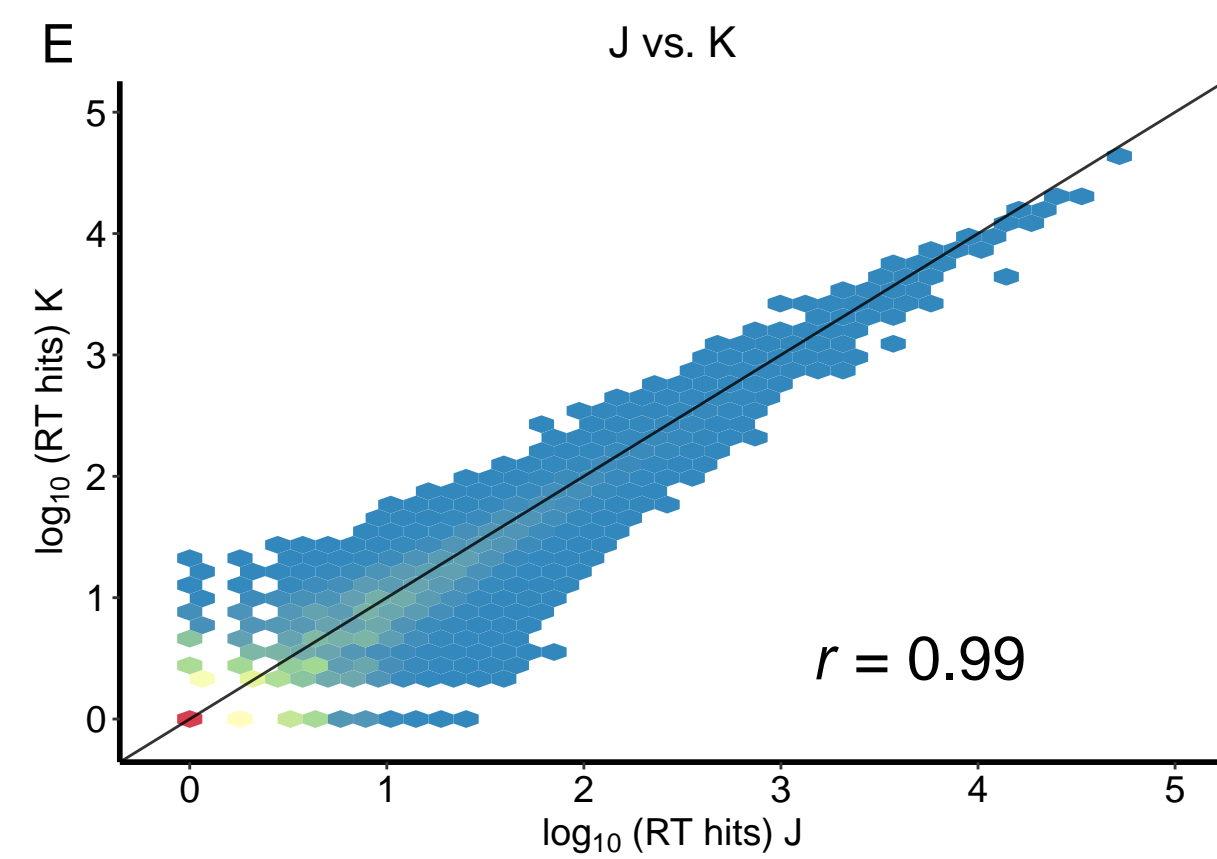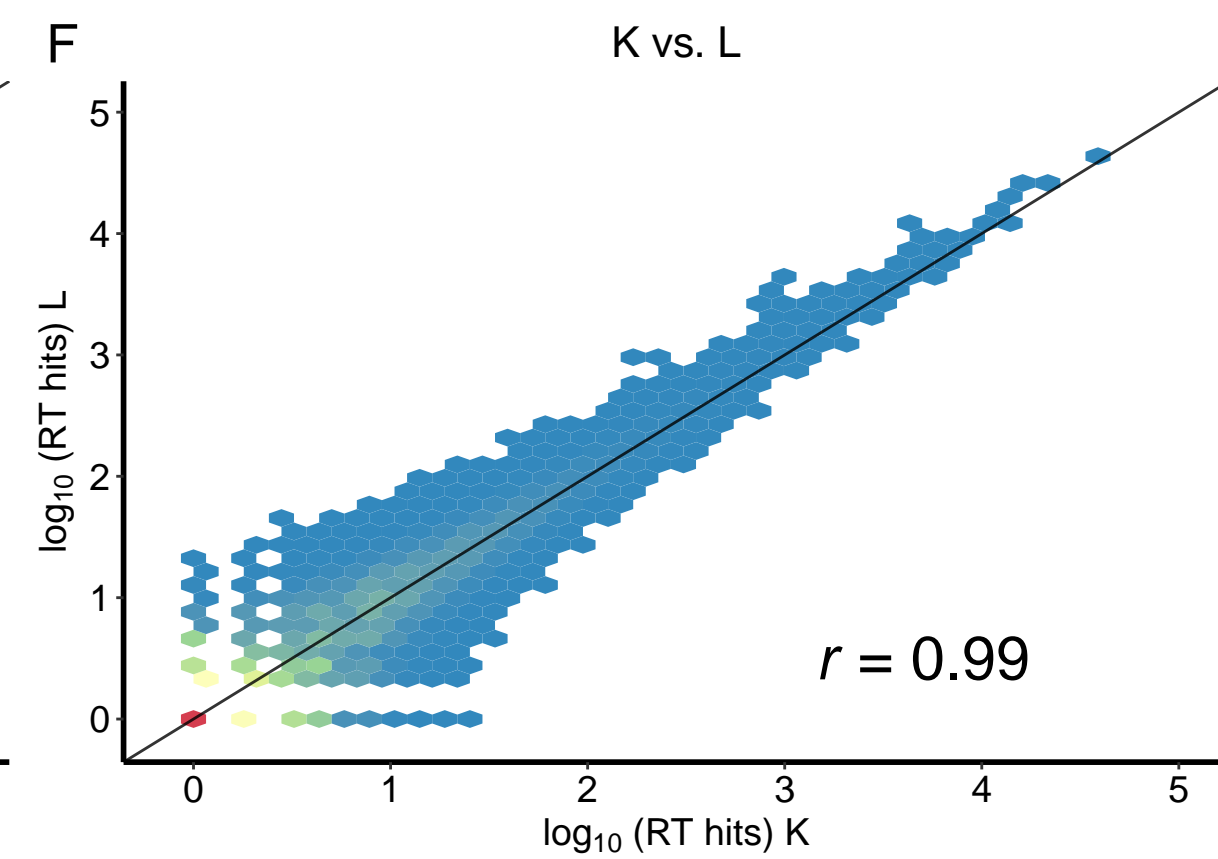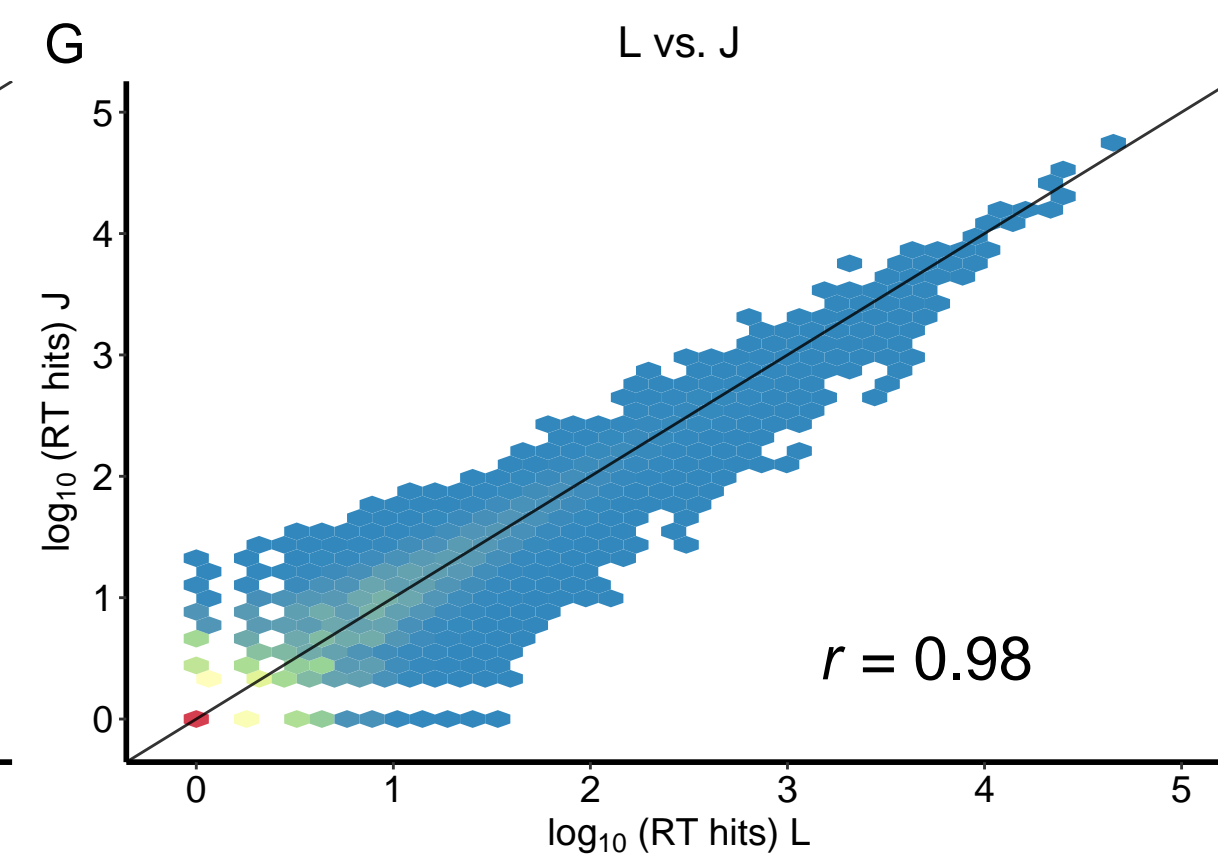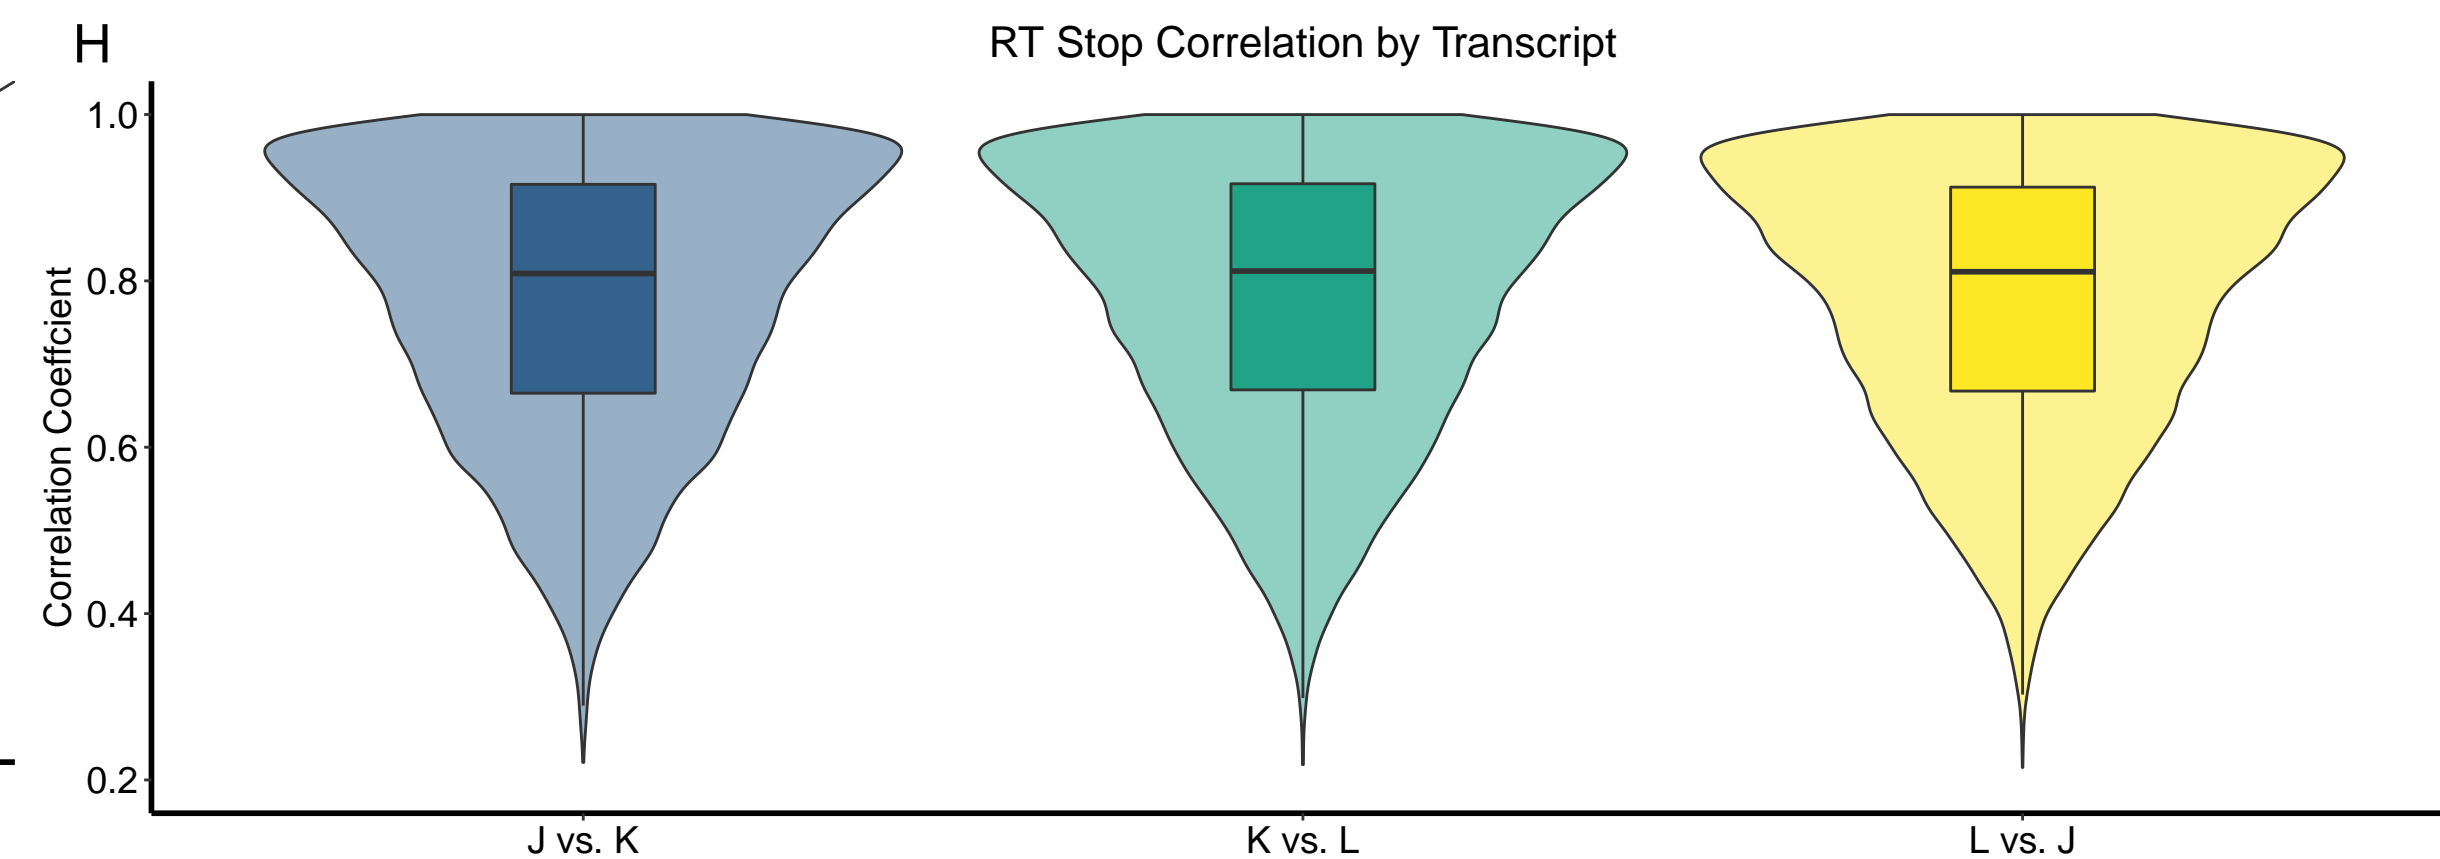

Root Control  
n = 17,315

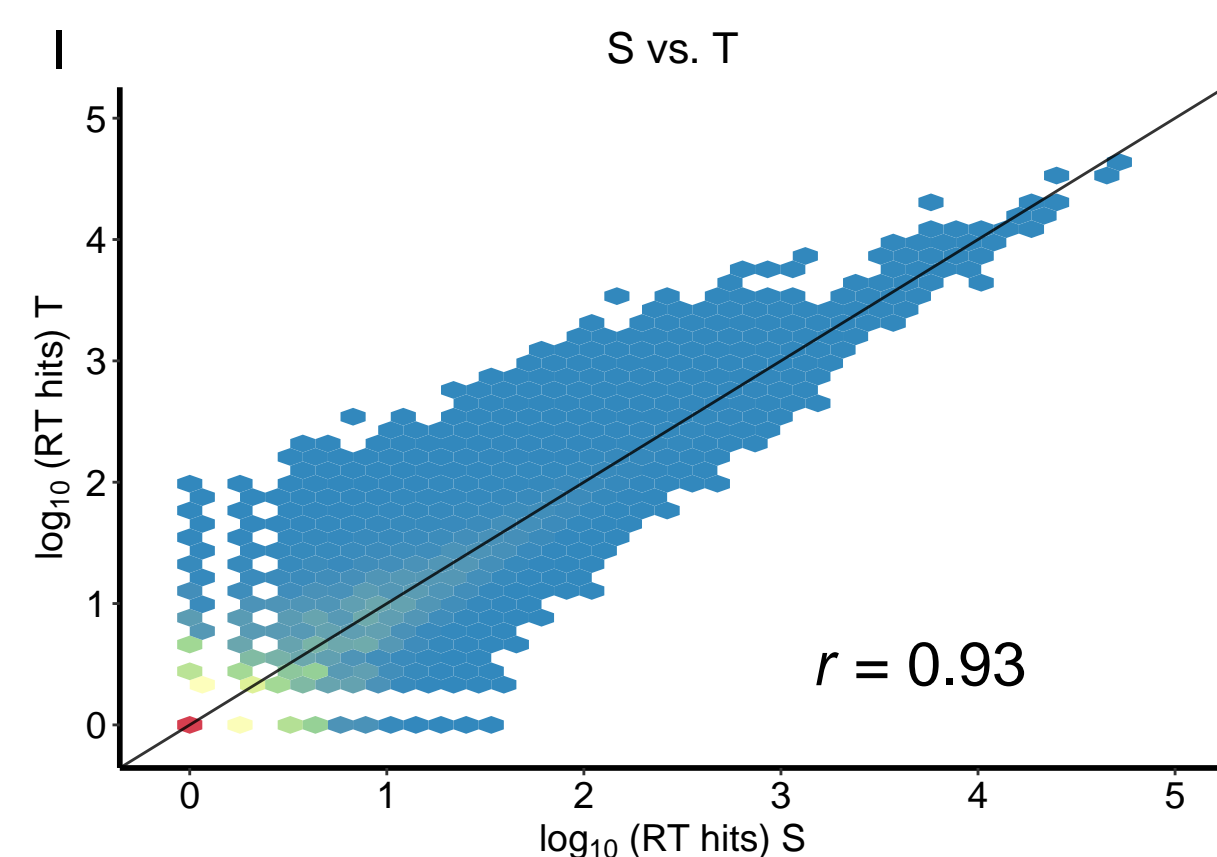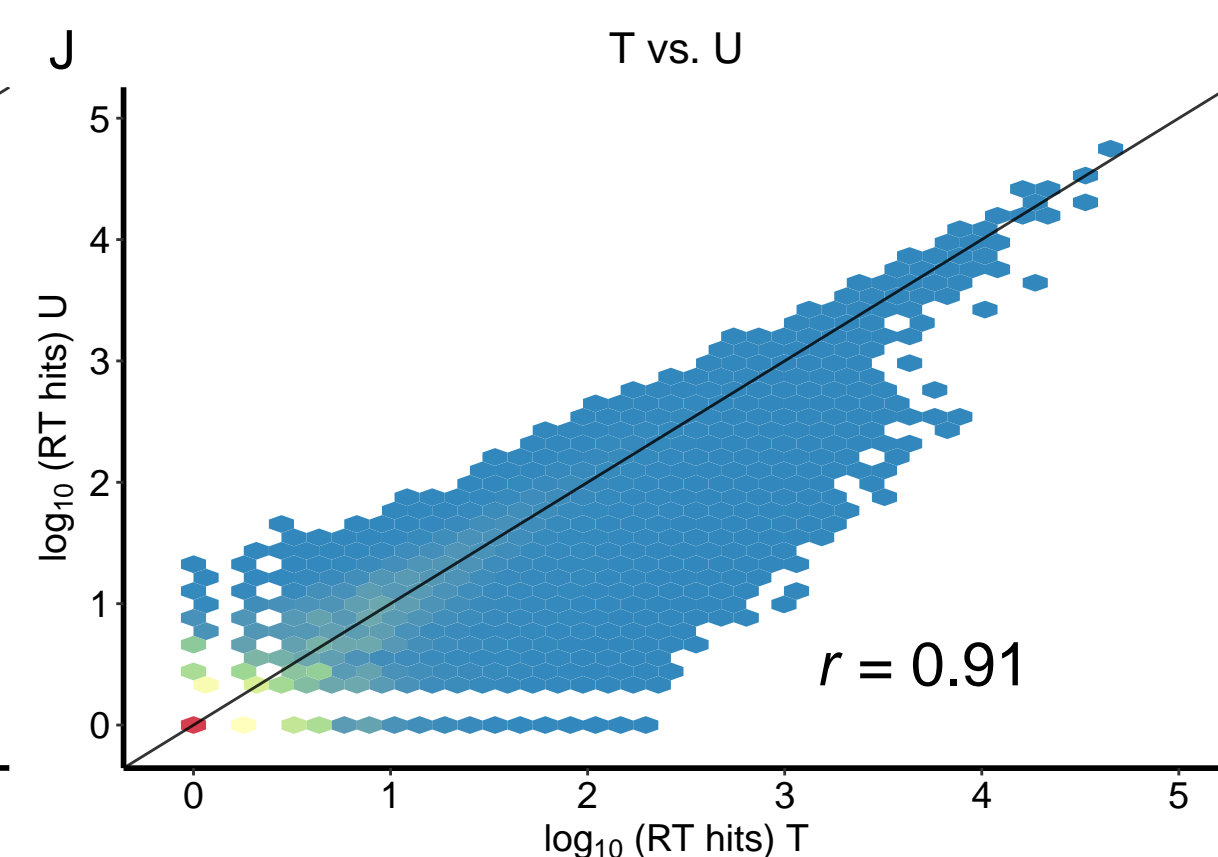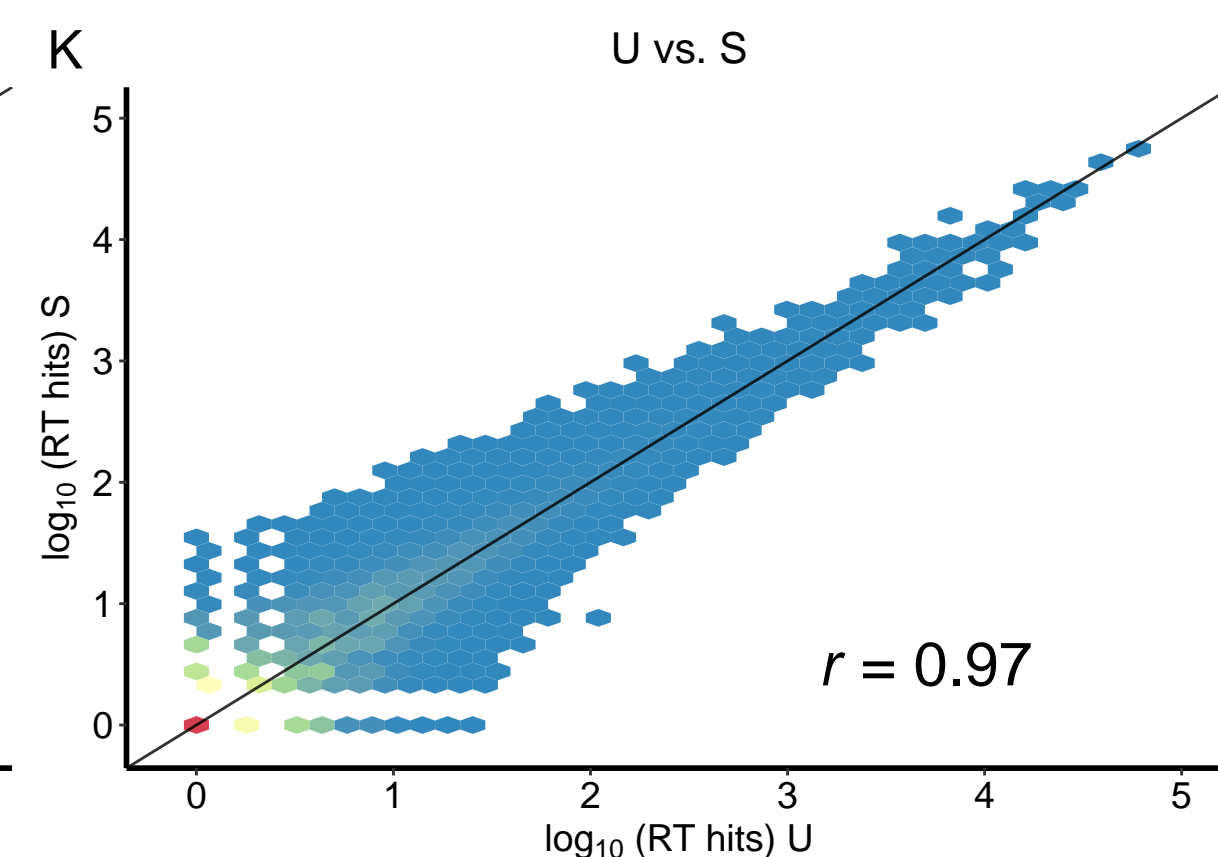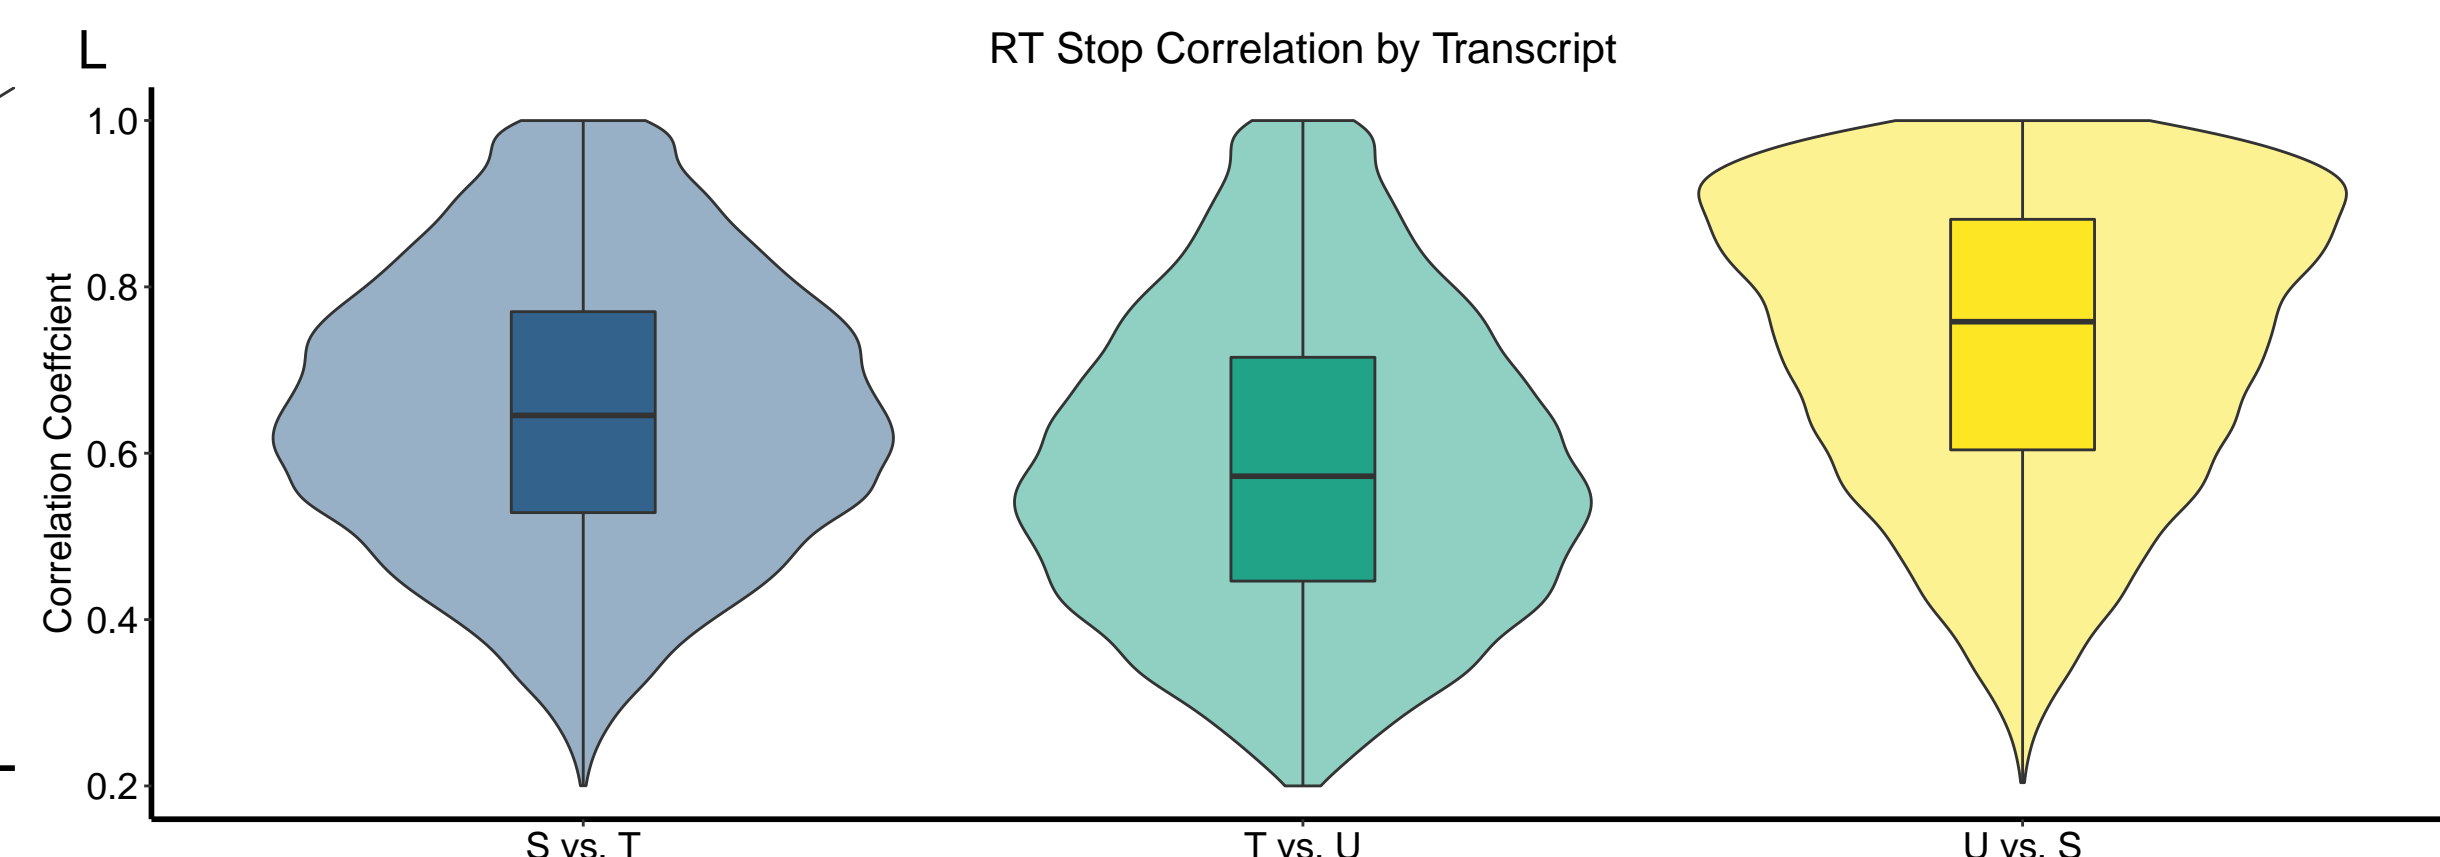

Root Salt  
n = 16,361

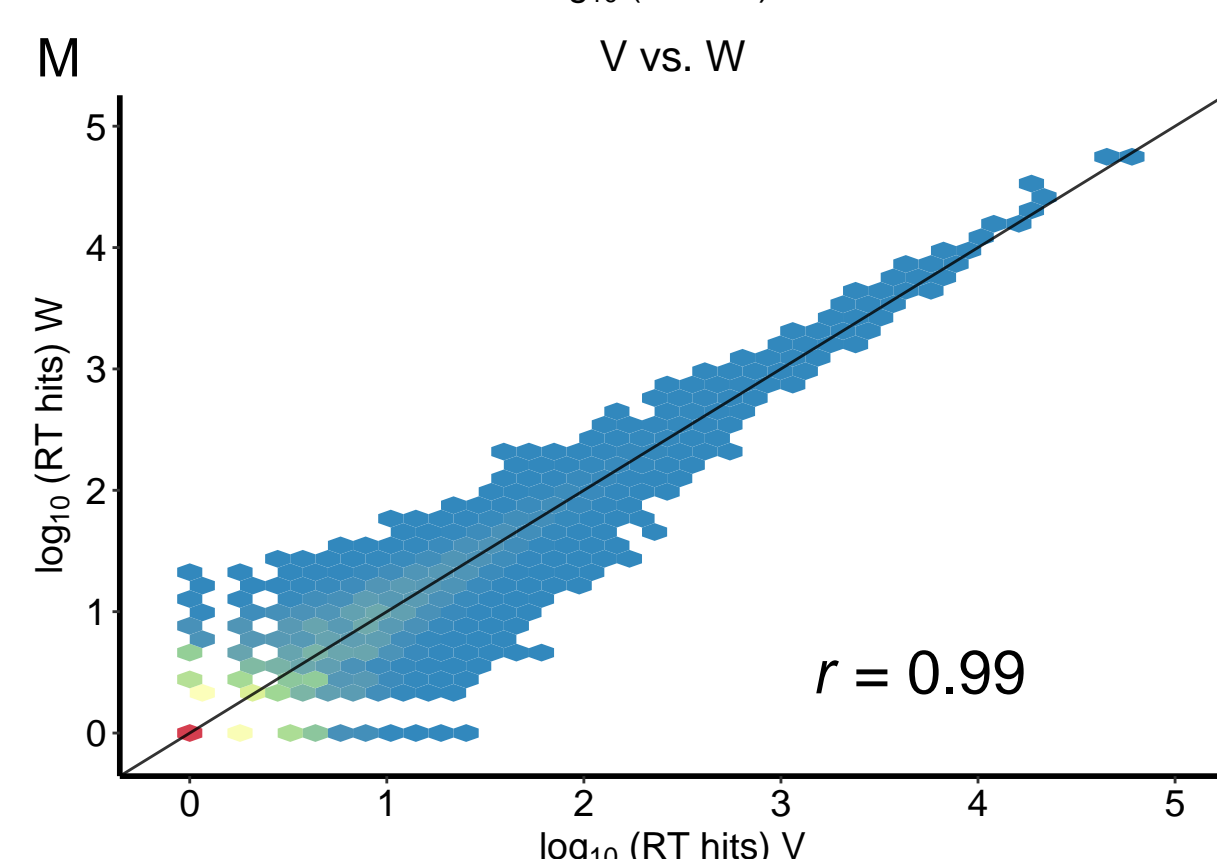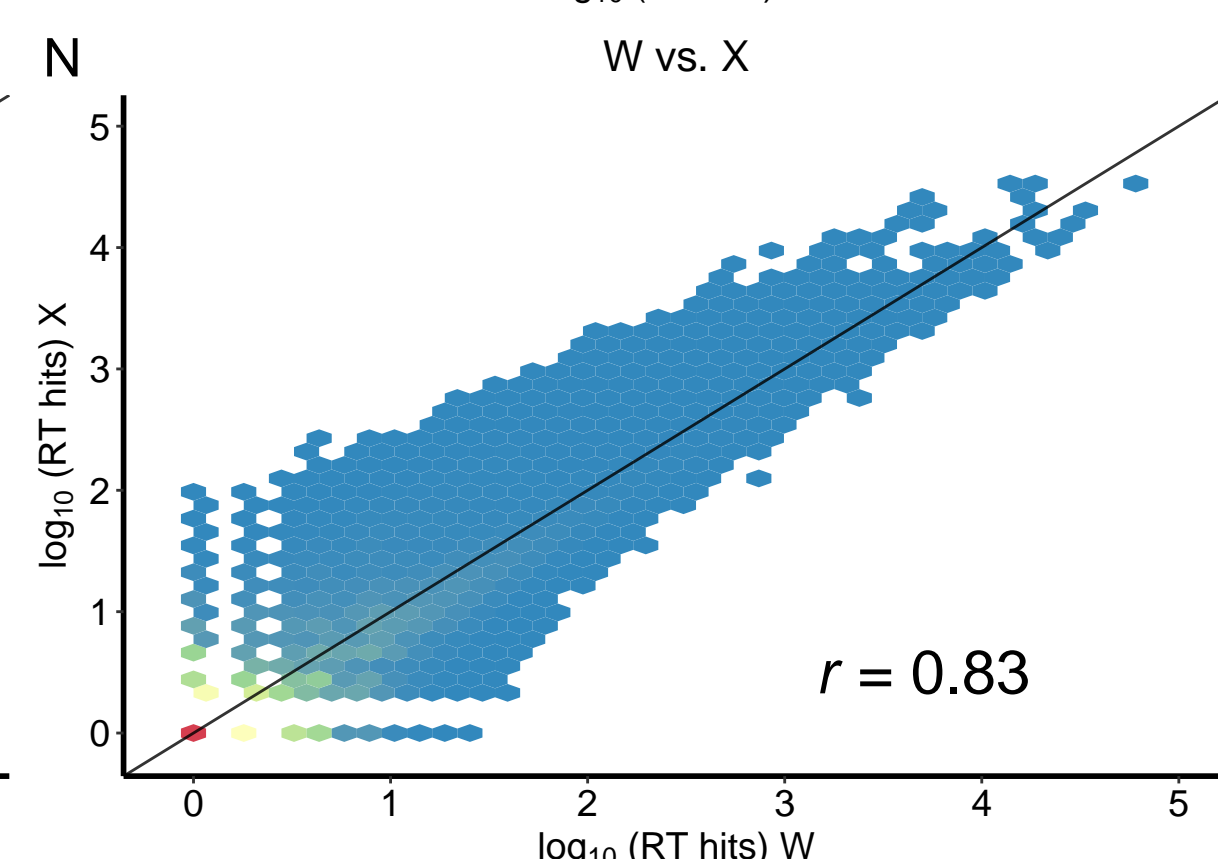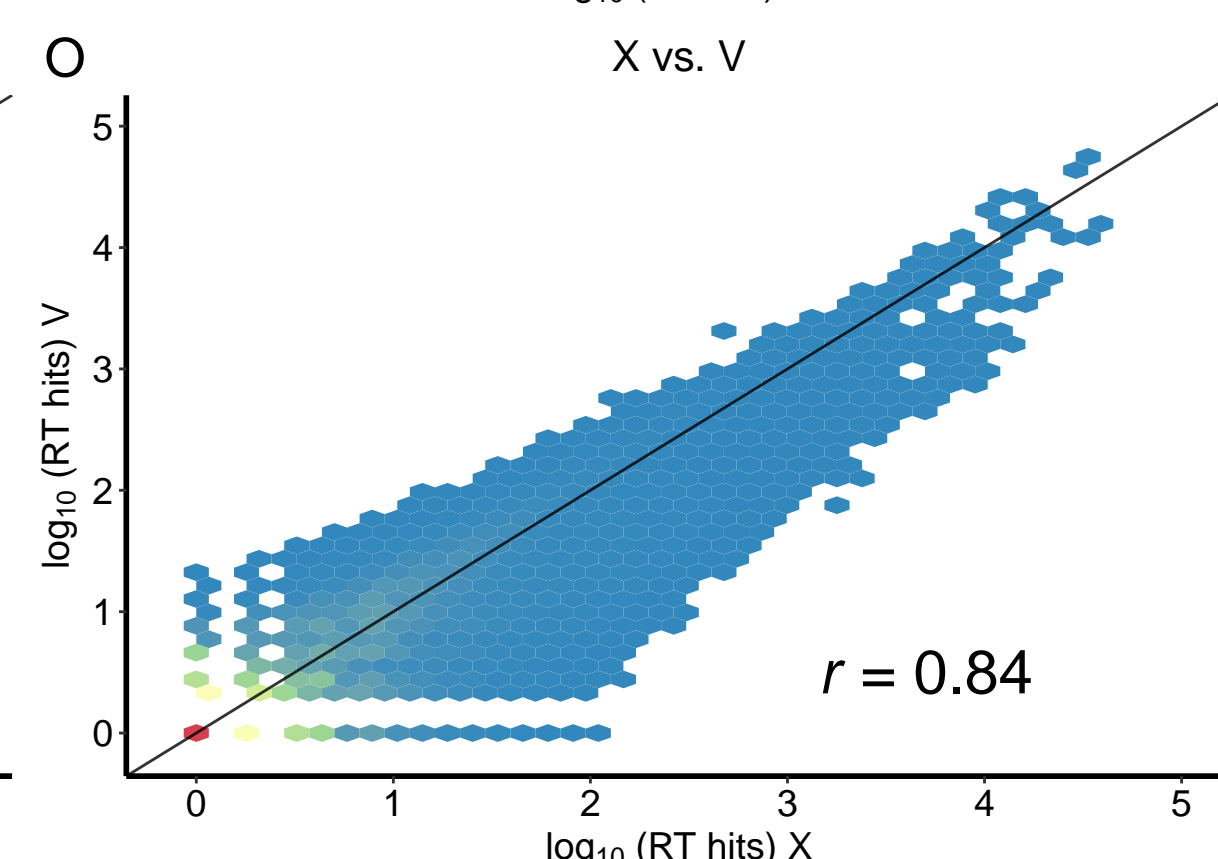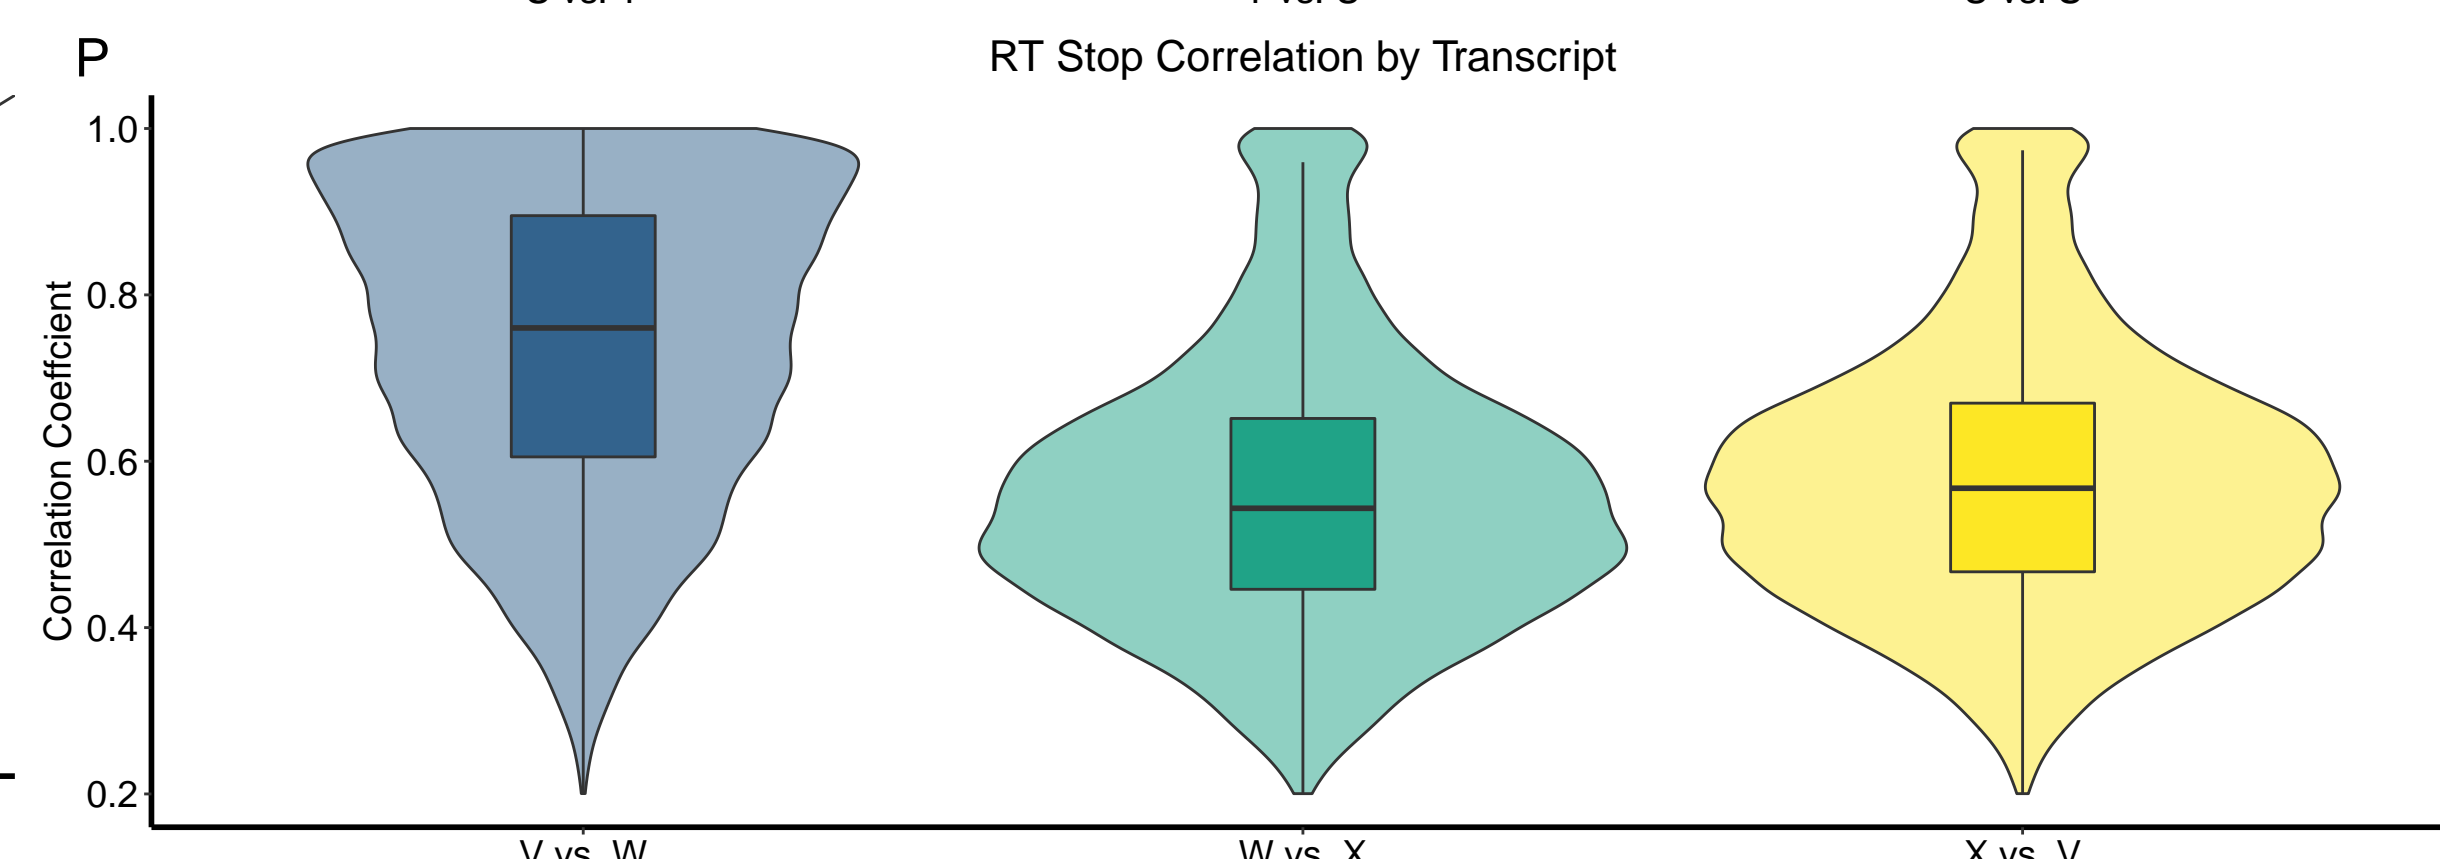

Supplement: supp_072850.119_Supplemental_Figure_1.pdf [file supp_072850.119_Supplemental_Figure_1.pdf]

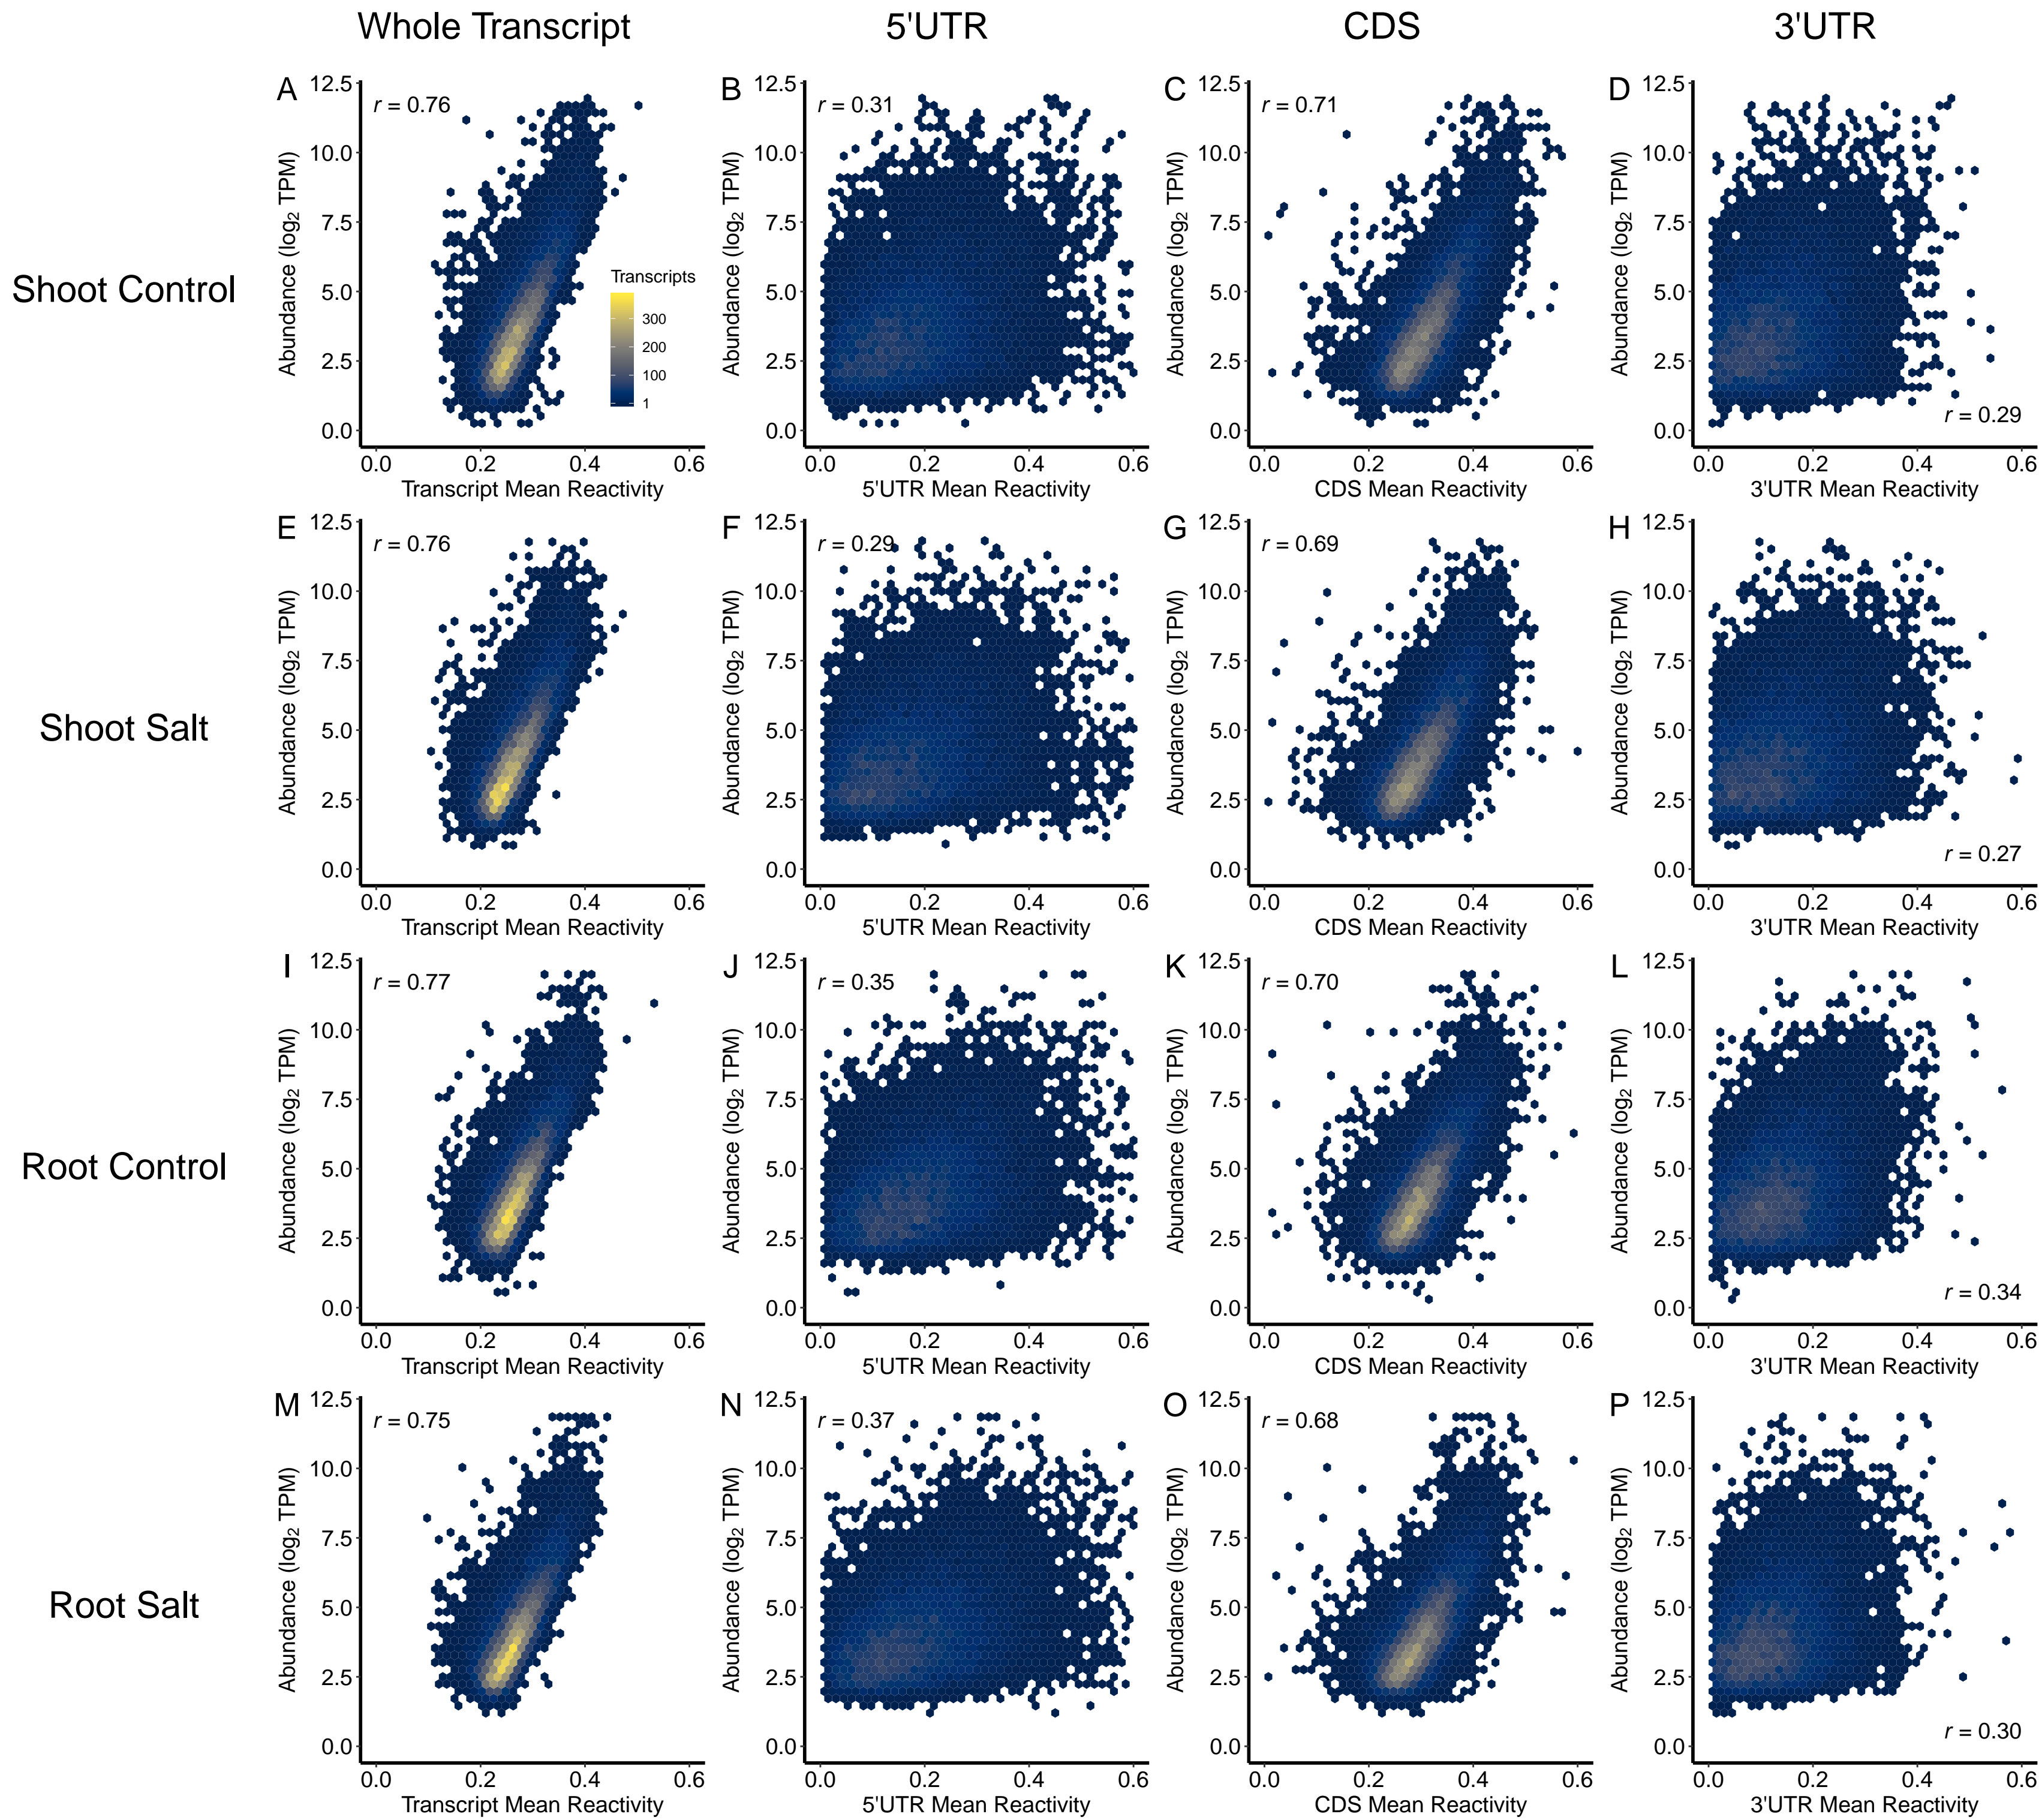

Supplement: supp_072850.119_Supplemental_Figure_10.pdf [file supp_072850.119_Supplemental_Figure_10.pdf]

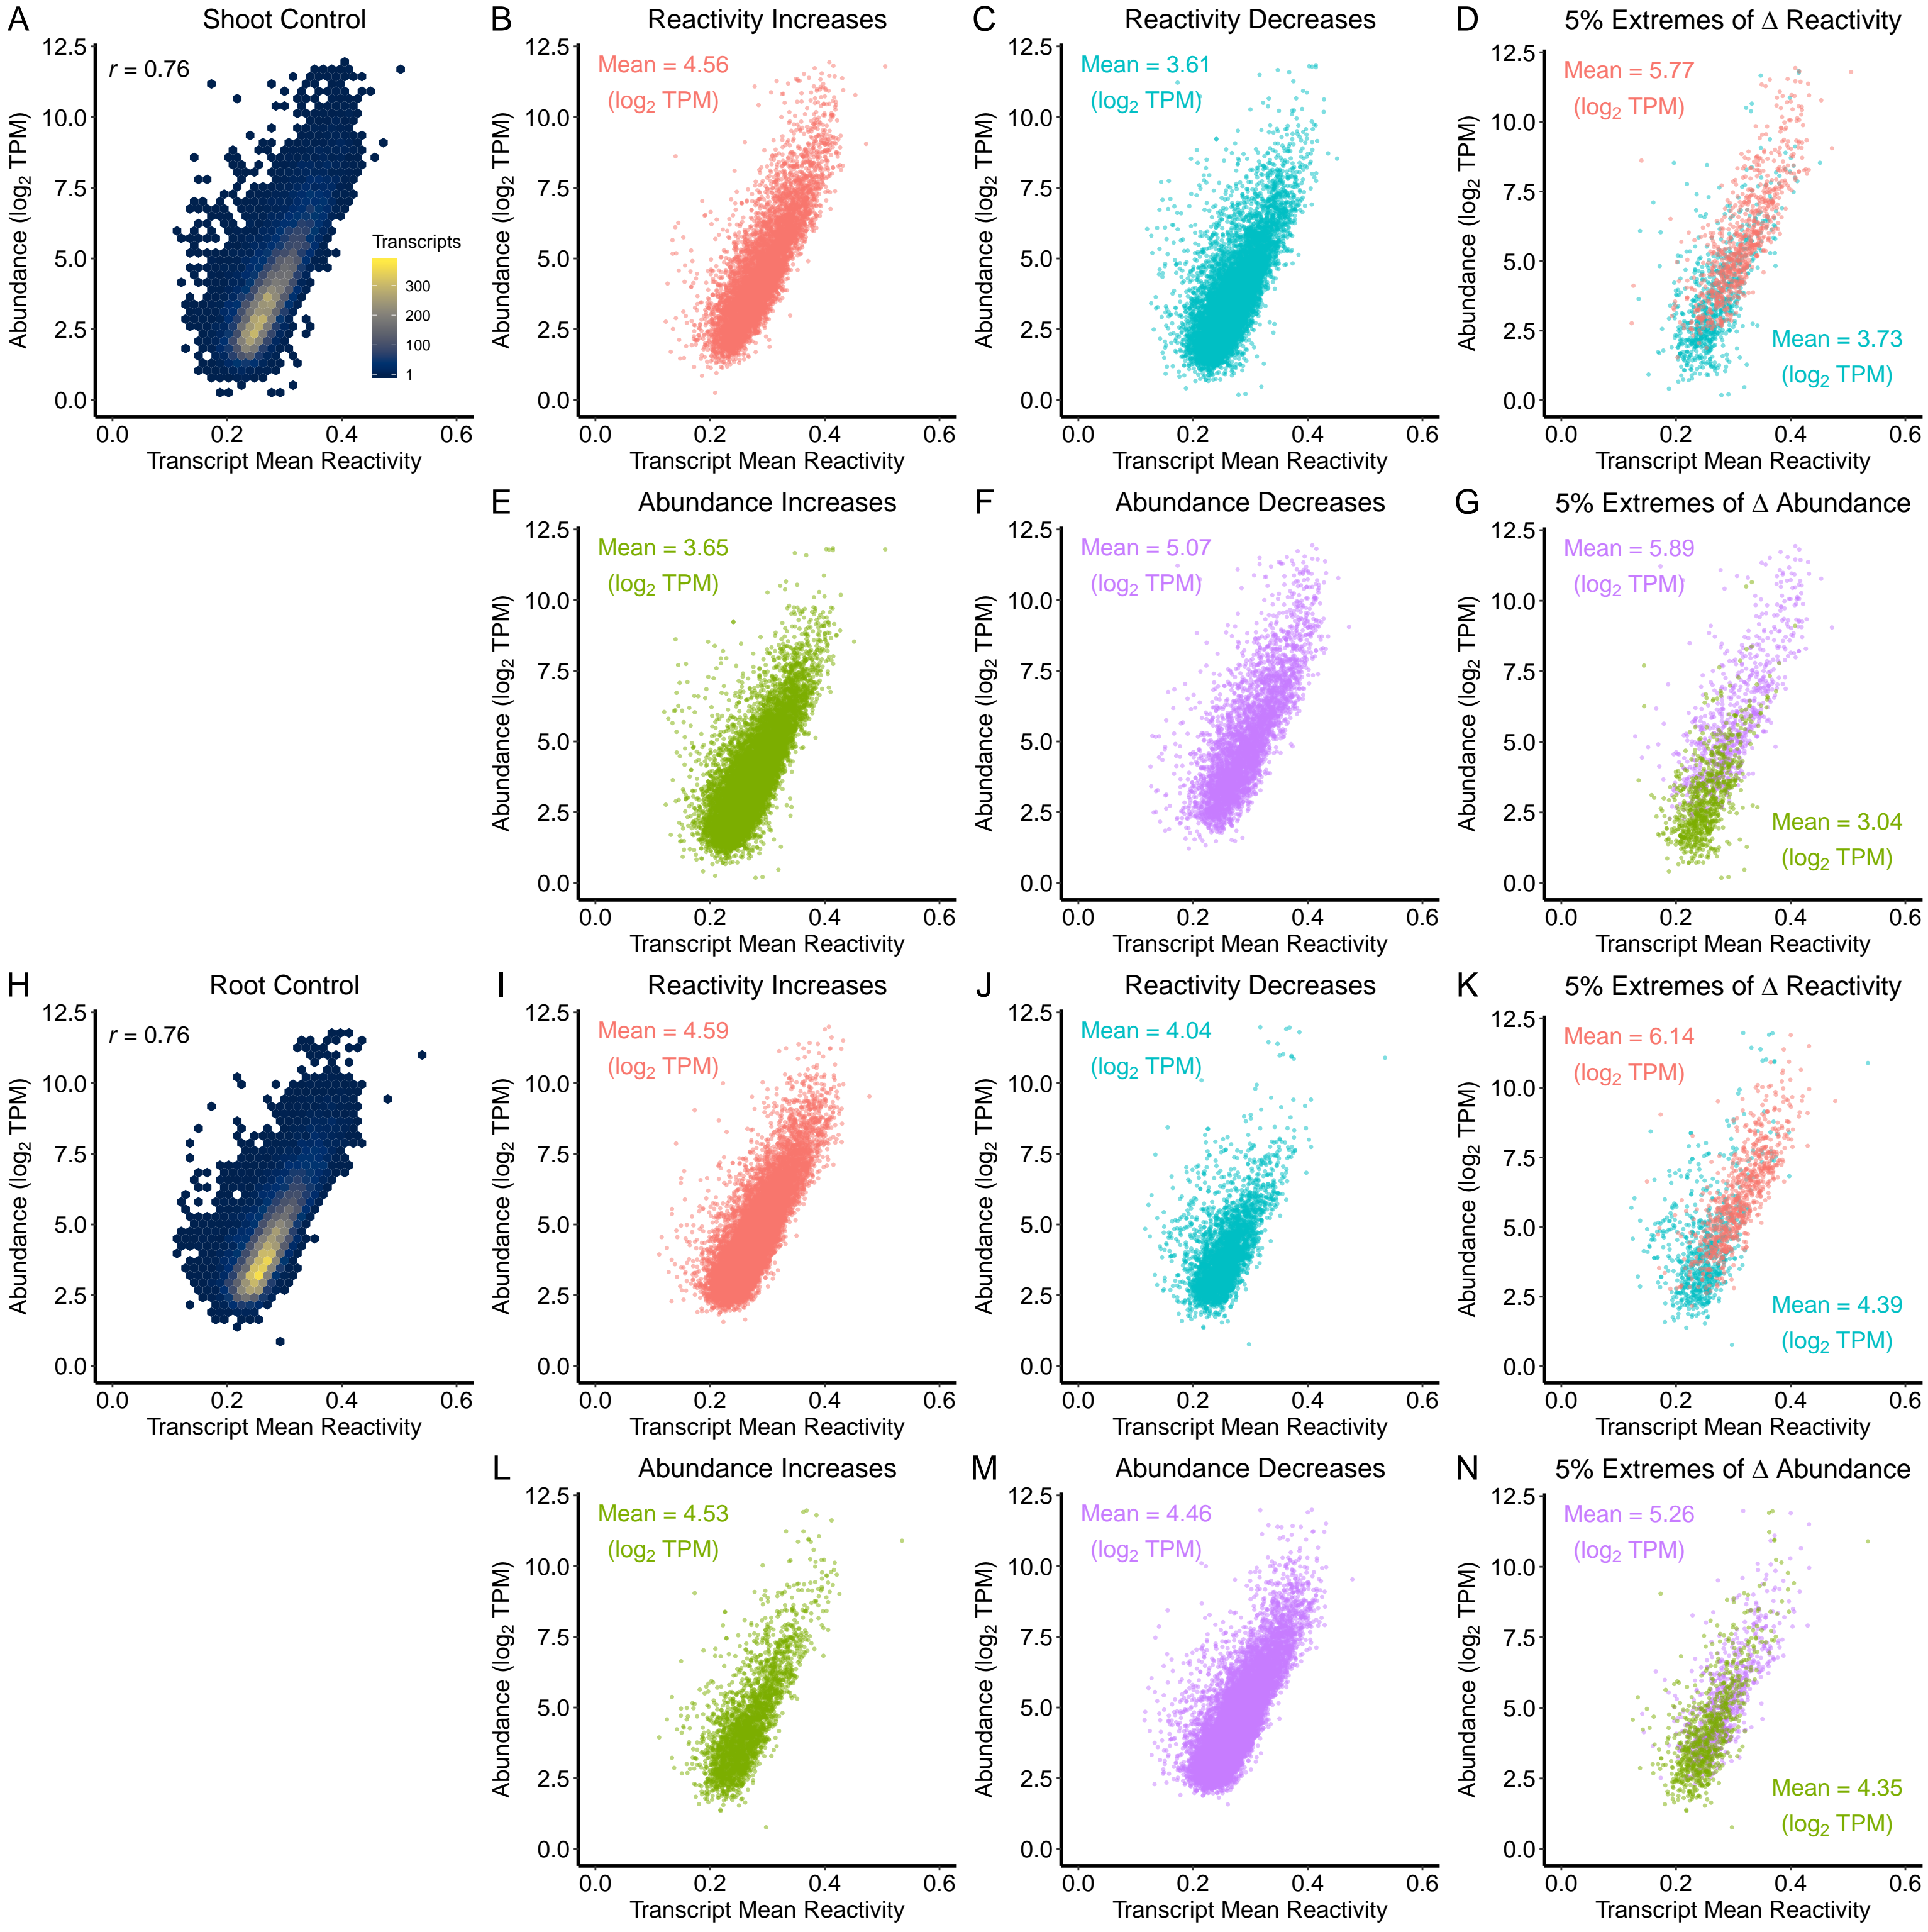

Supplement: supp_072850.119_Supplemental_Figure_11.pdf [file supp_072850.119_Supplemental_Figure_11.pdf]

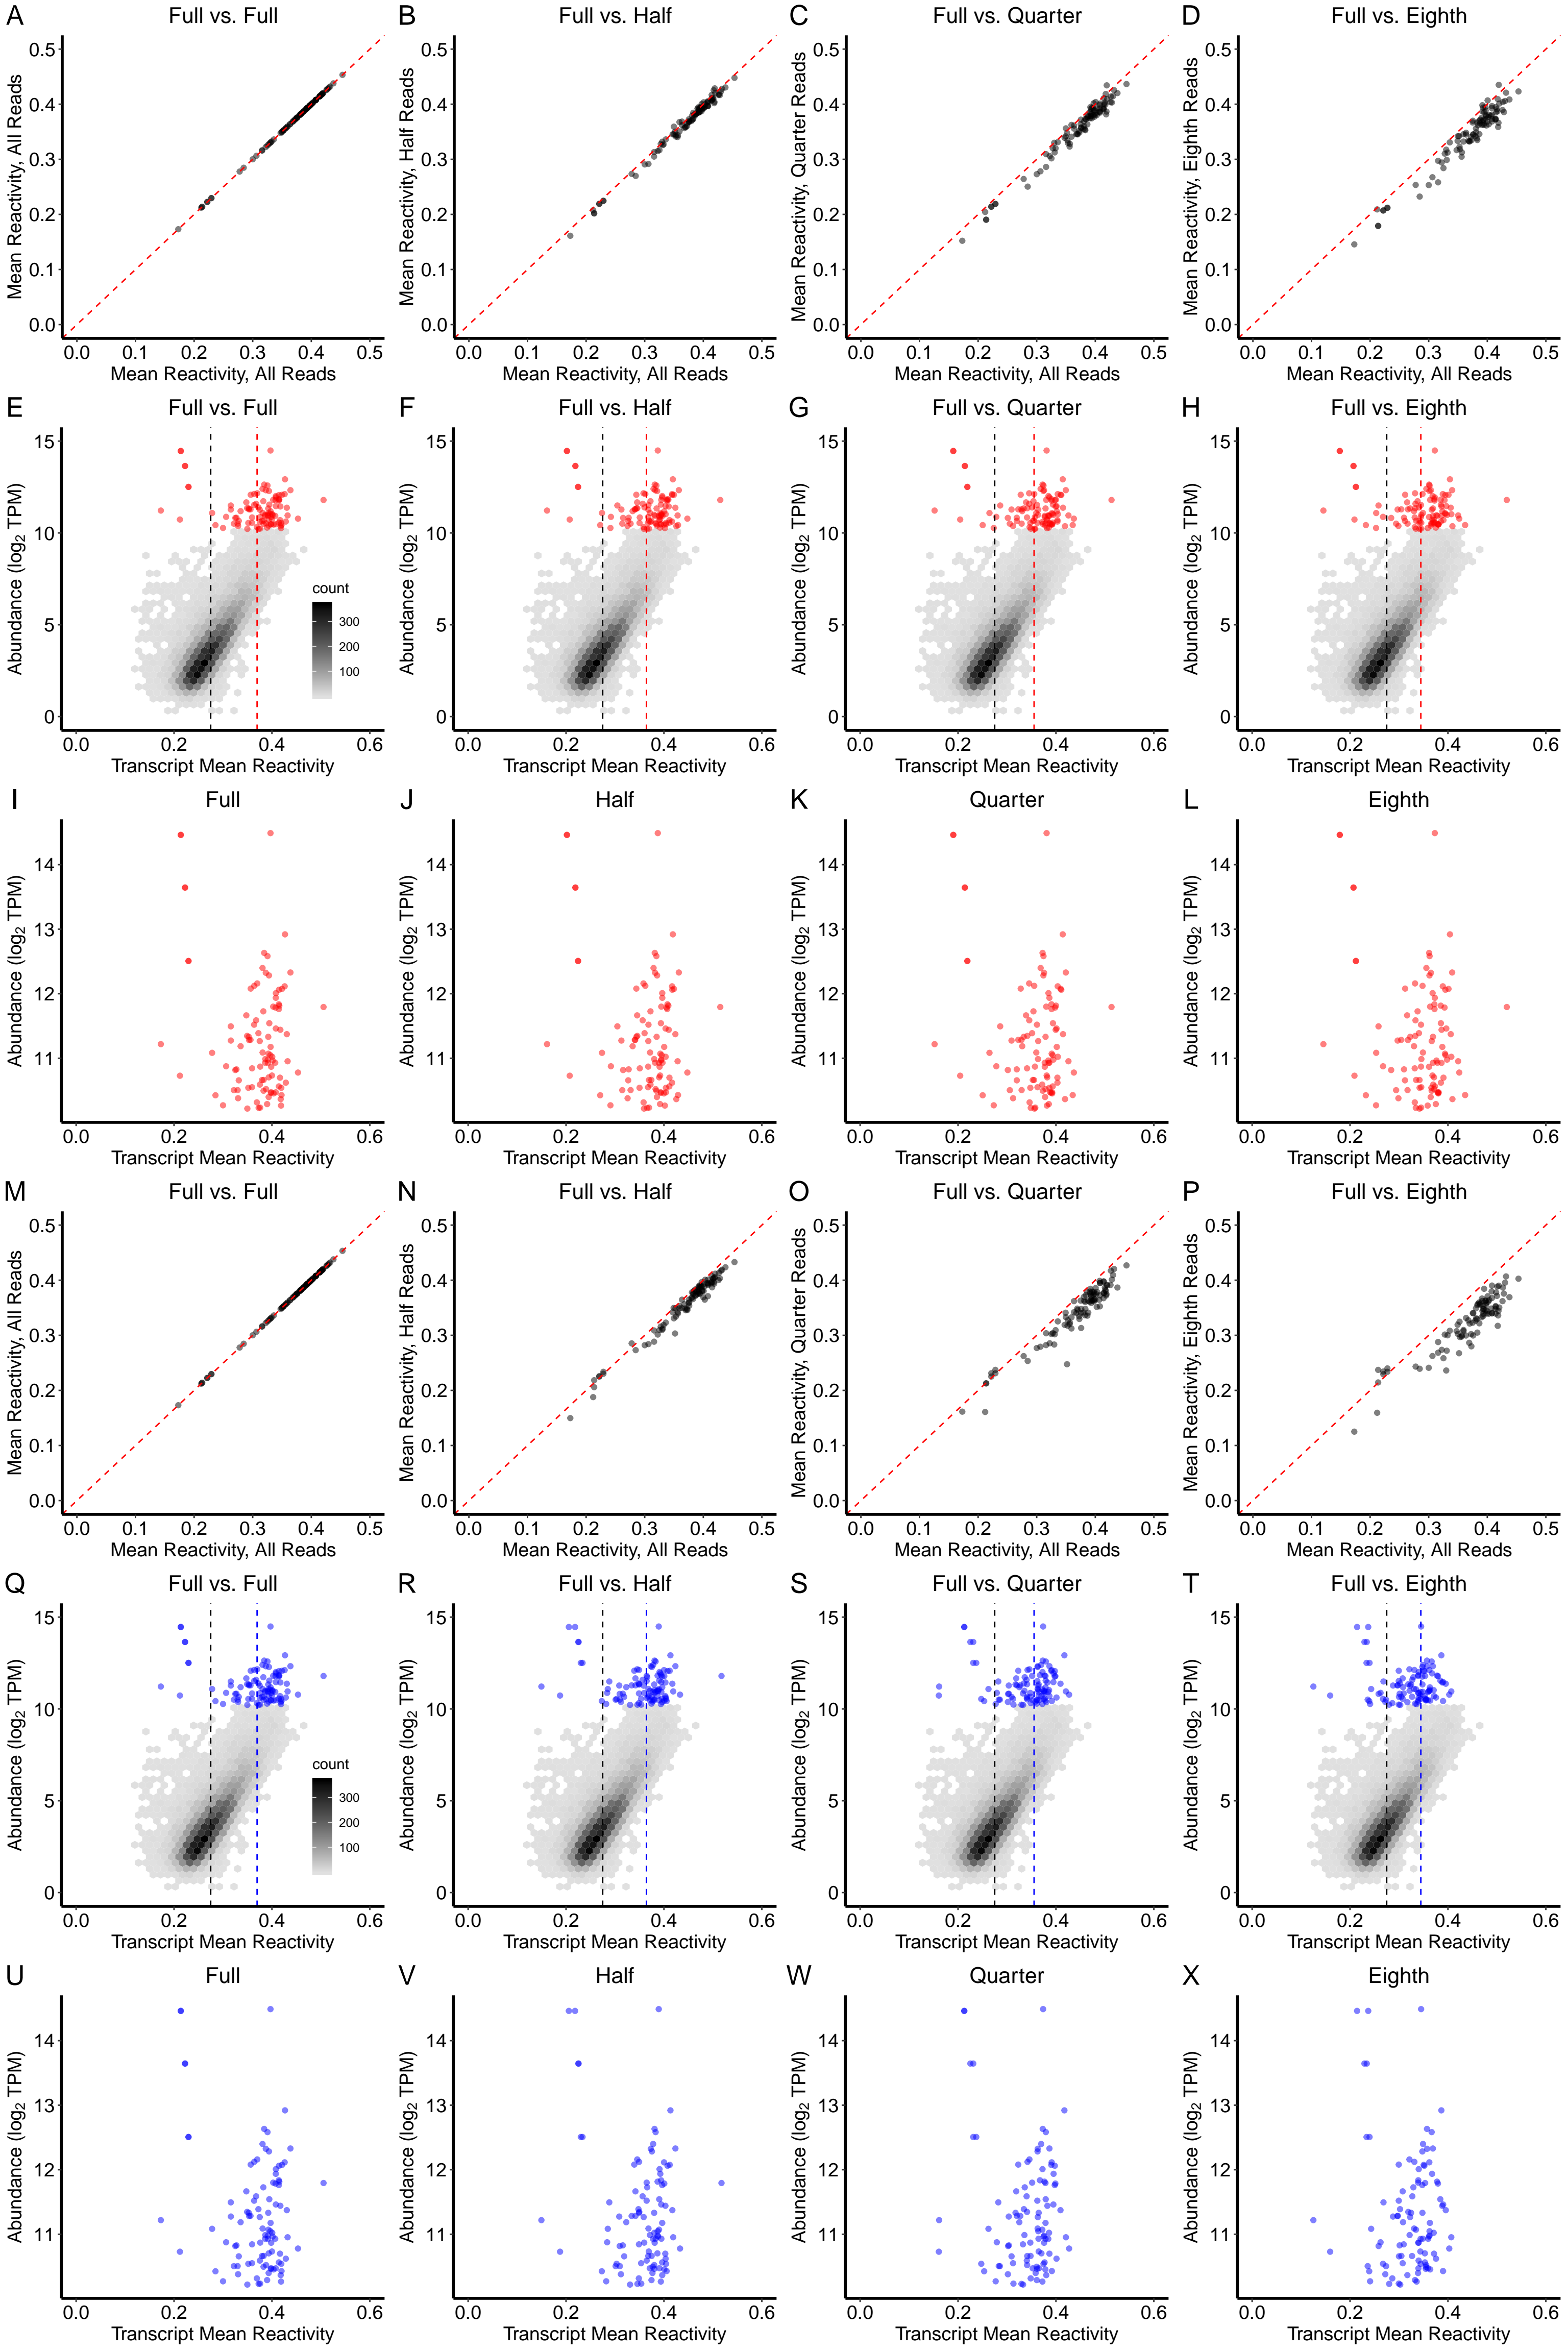

Supplement: supp_072850.119_Supplemental_Figure_12.pdf [file supp_072850.119_Supplemental_Figure_12.pdf]

# Paralleled NaCl Induced Abundance Changes

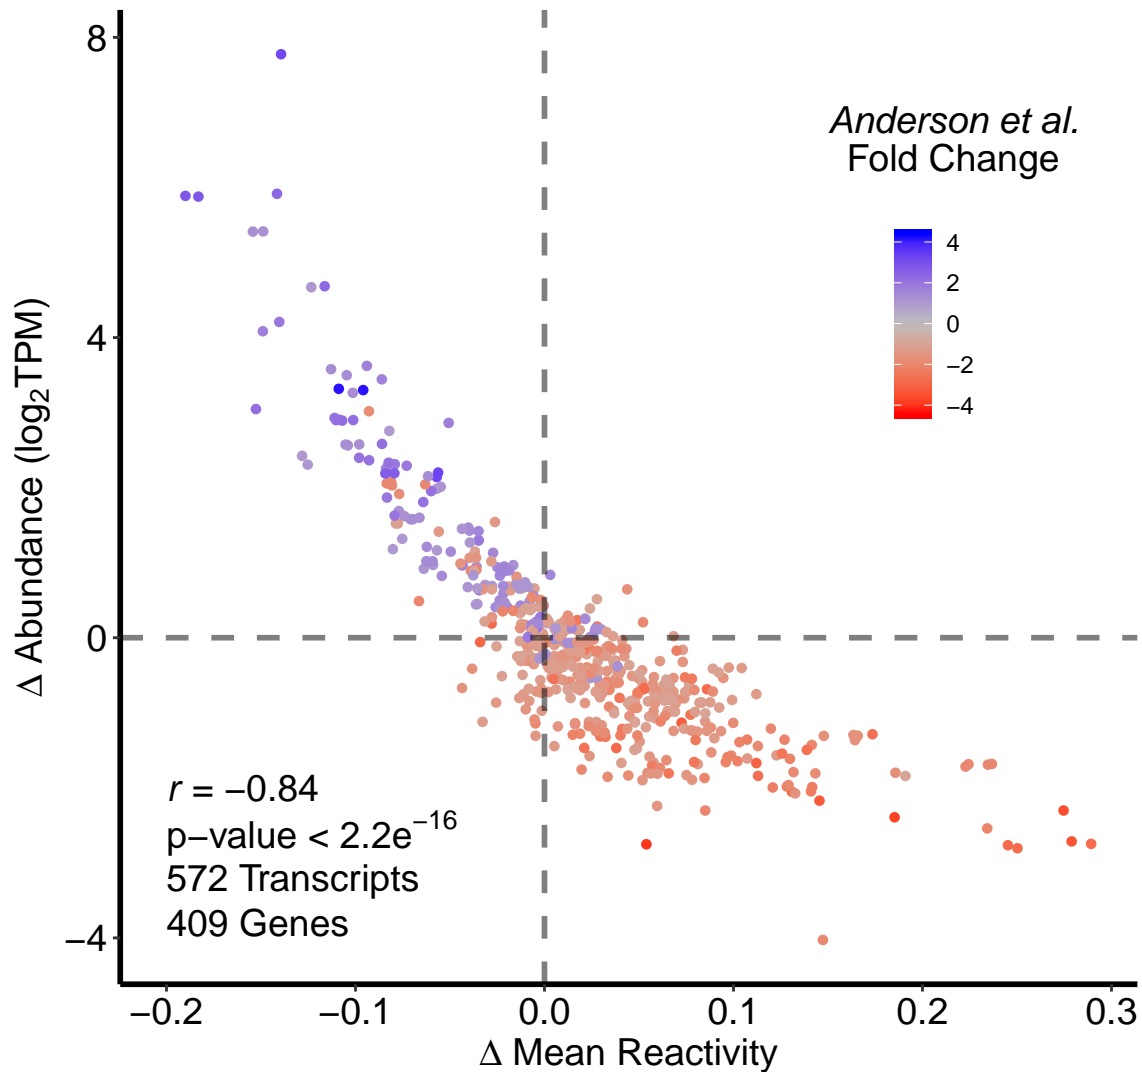

Supplement: supp_072850.119_Supplemental_Figure_14.pdf [file supp_072850.119_Supplemental_Figure_14.pdf]

# Transcripts Lacking m<sup>6</sup>A Modifications

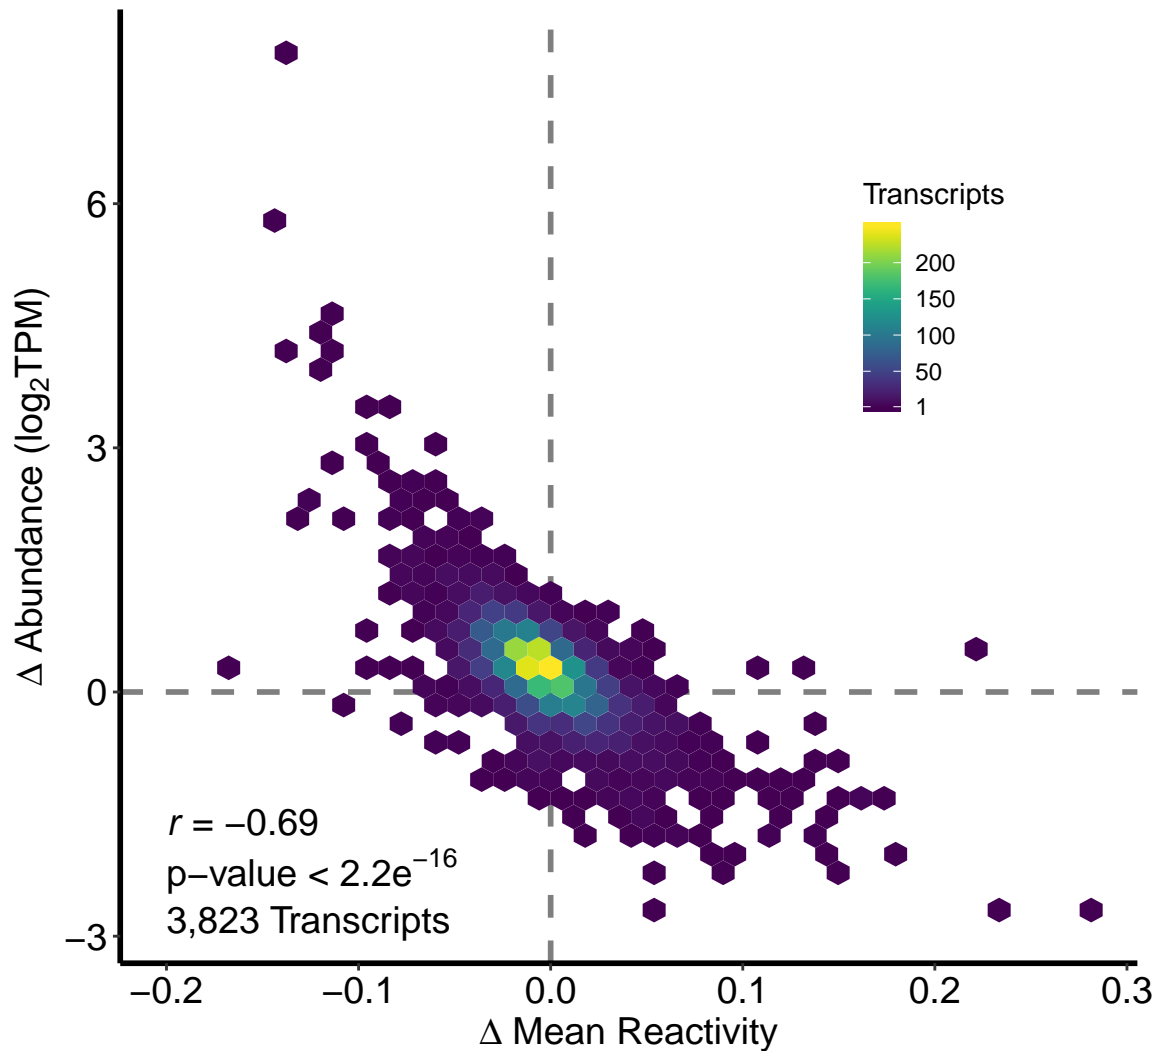

Supplement: supp_072850.119_Supplemental_Figure_15.pdf [file supp_072850.119_Supplemental_Figure_15.pdf]

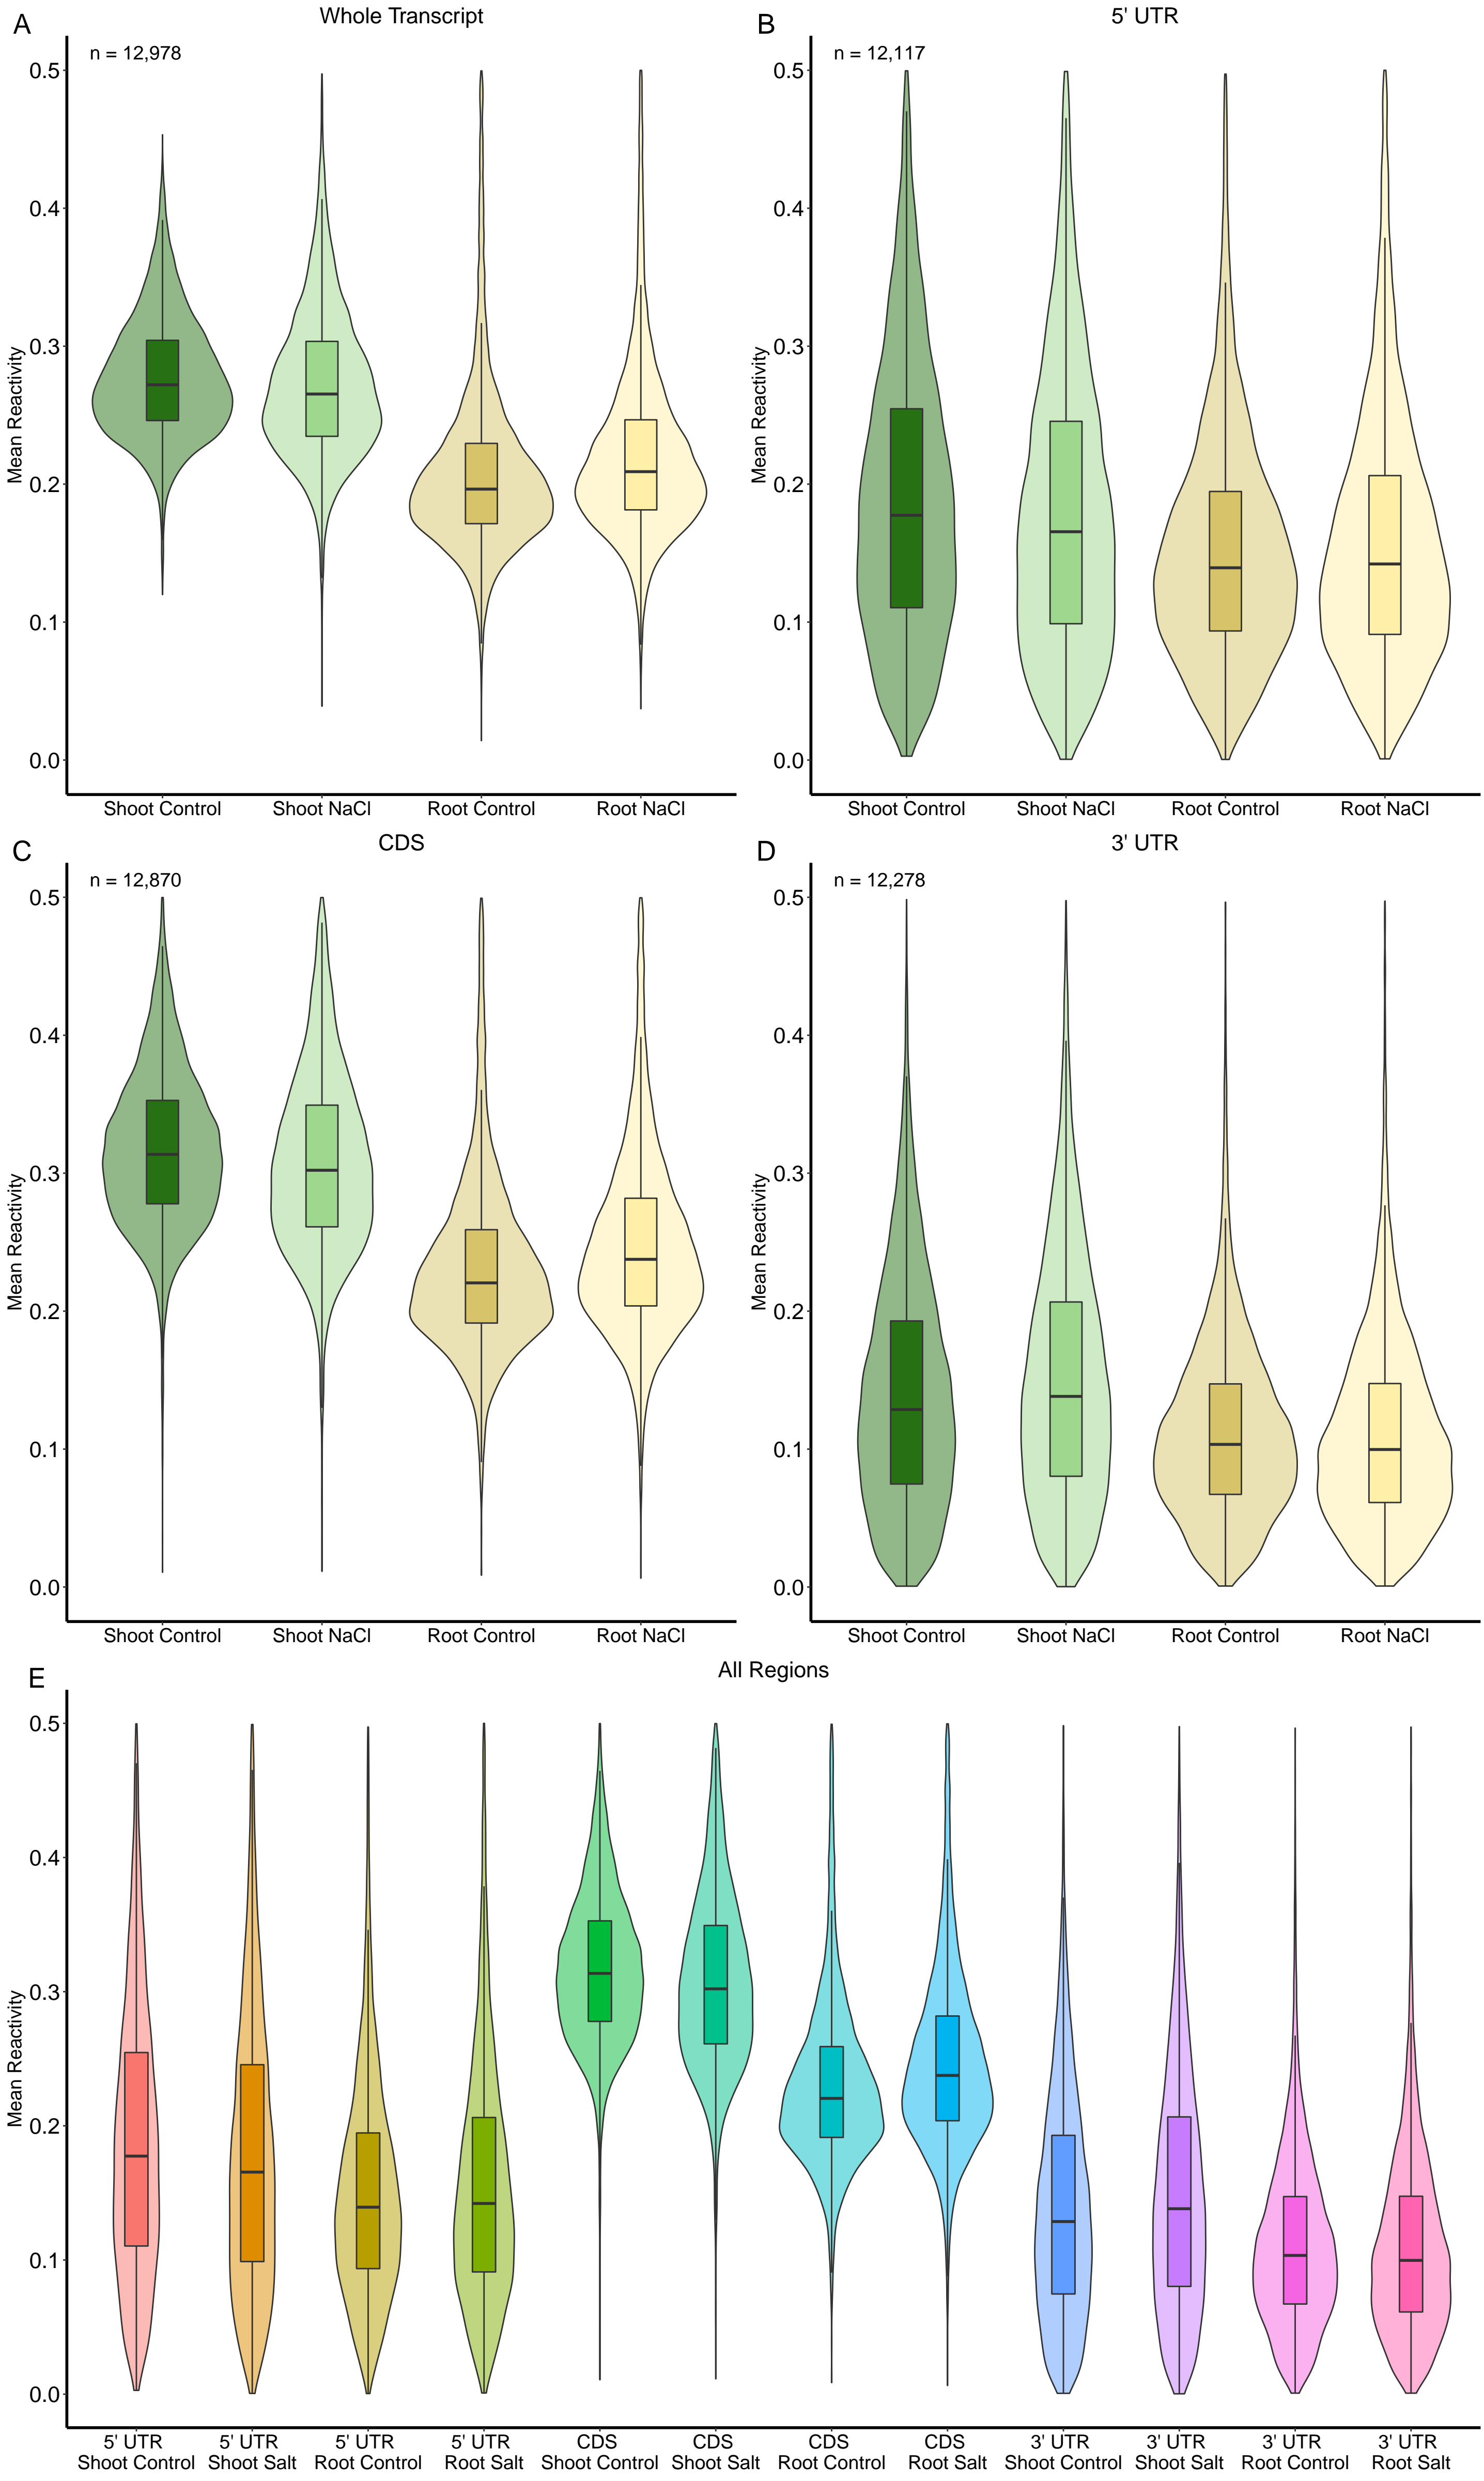

Supplement: supp_072850.119_Supplemental_Figure_6.pdf [file supp_072850.119_Supplemental_Figure_6.pdf]

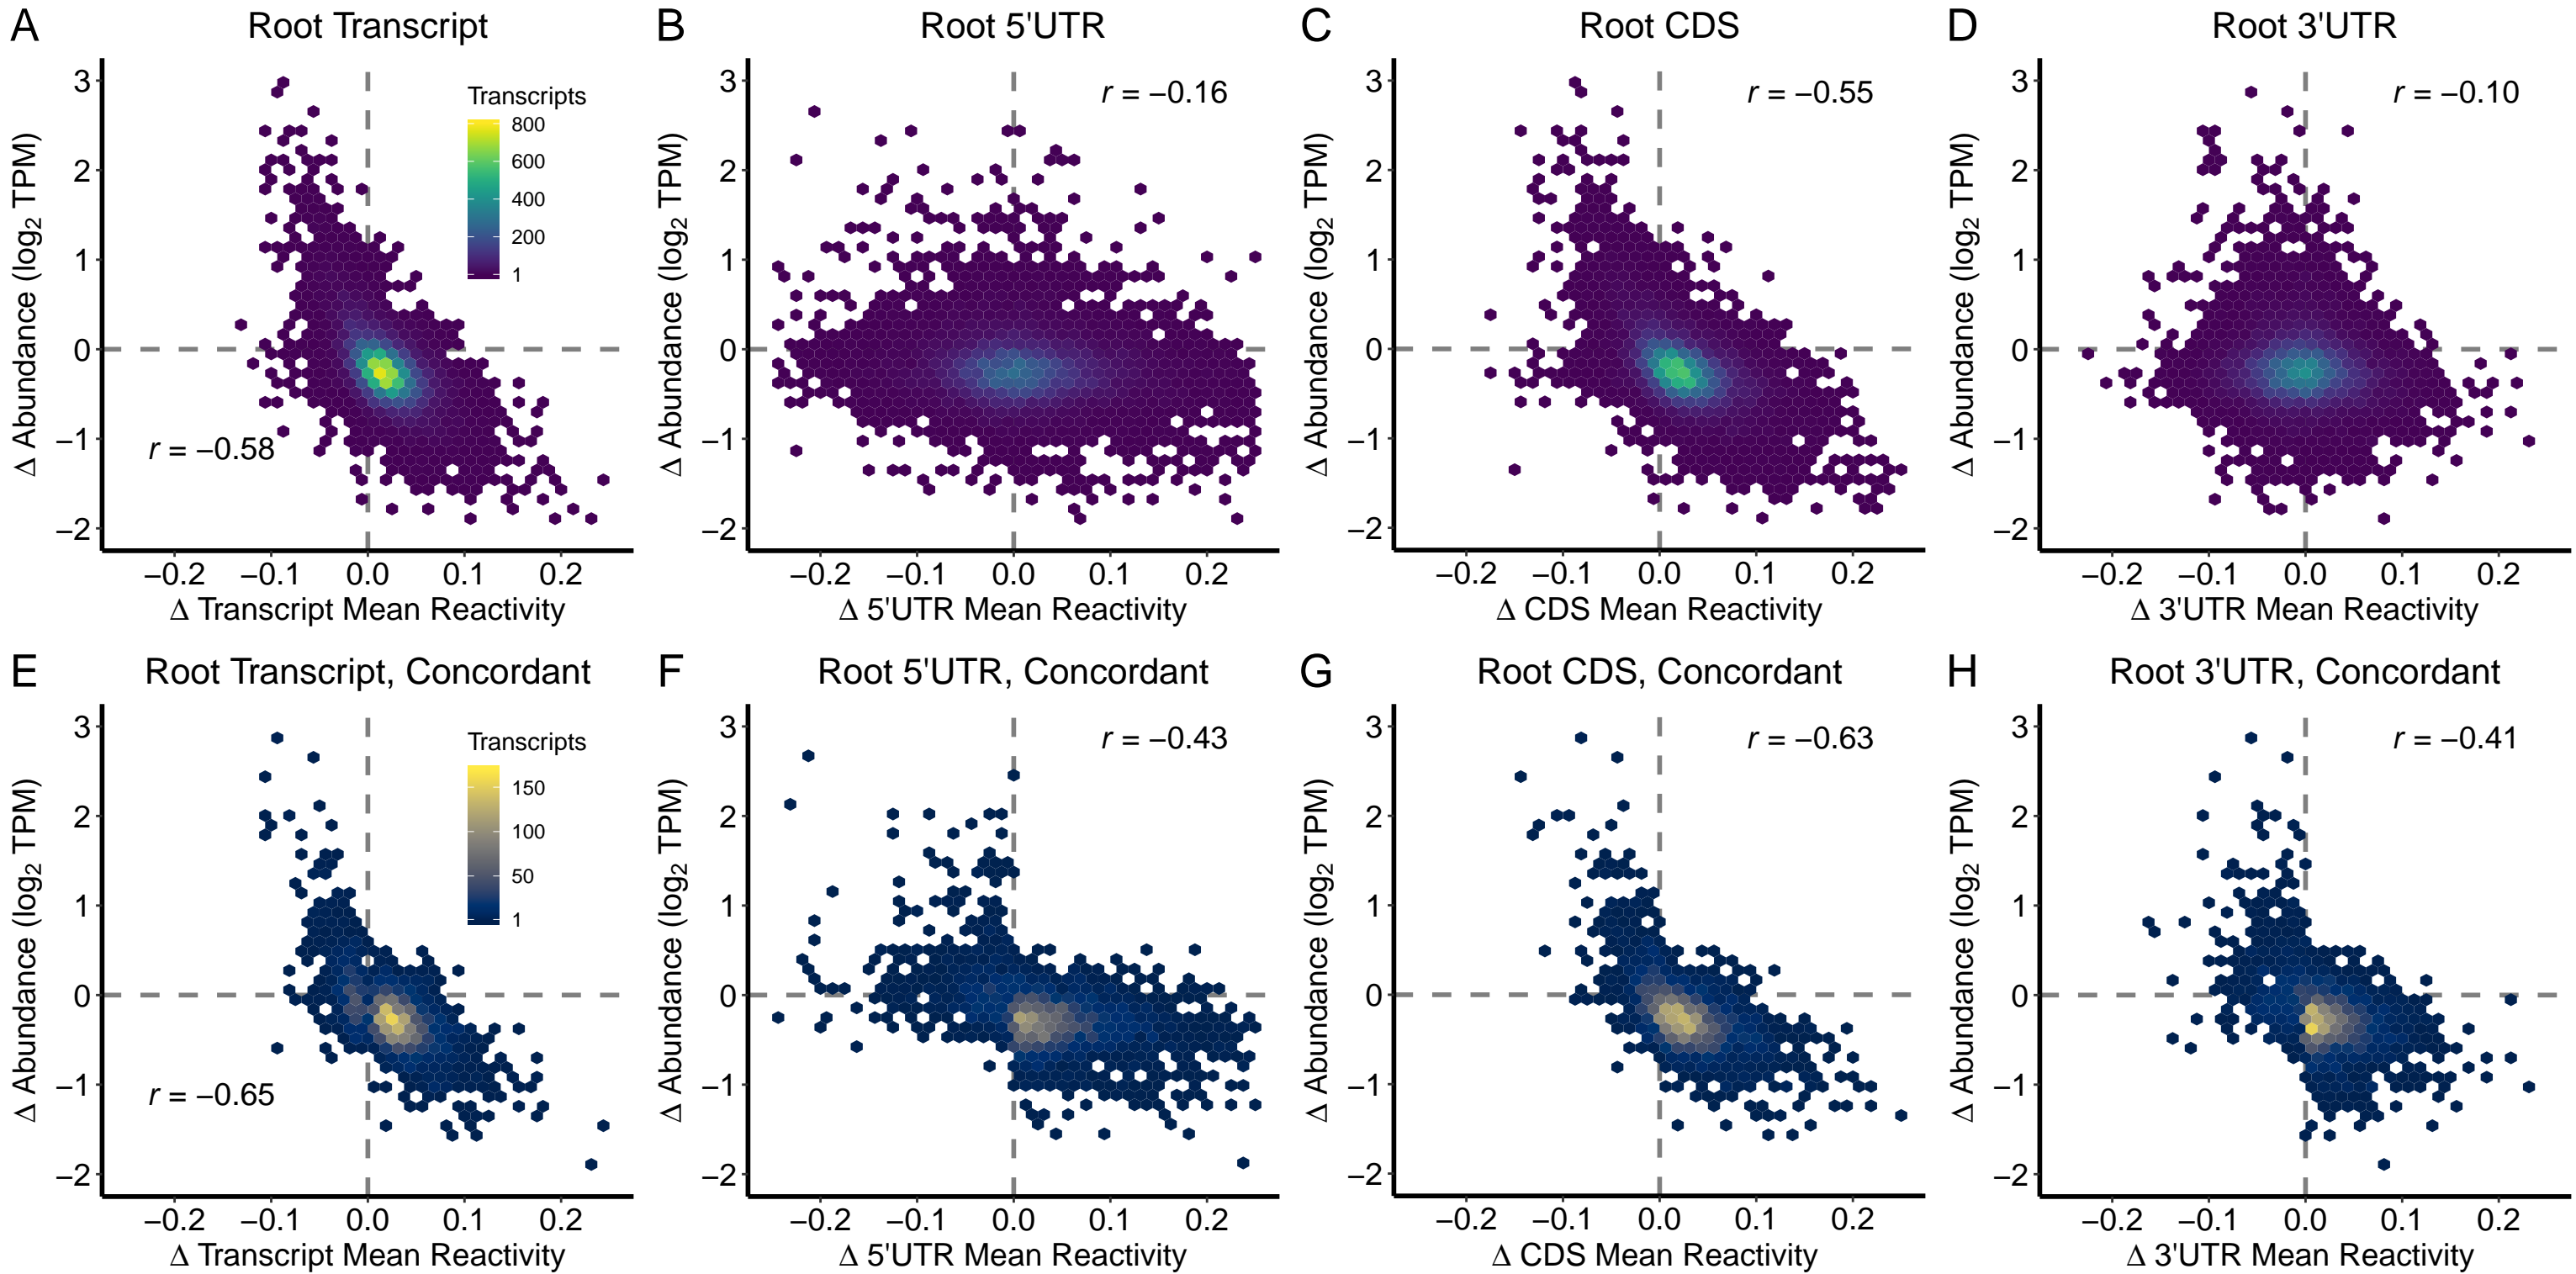

Supplement: supp_072850.119_Supplemental_Figure_7.pdf [file supp_072850.119_Supplemental_Figure_7.pdf]

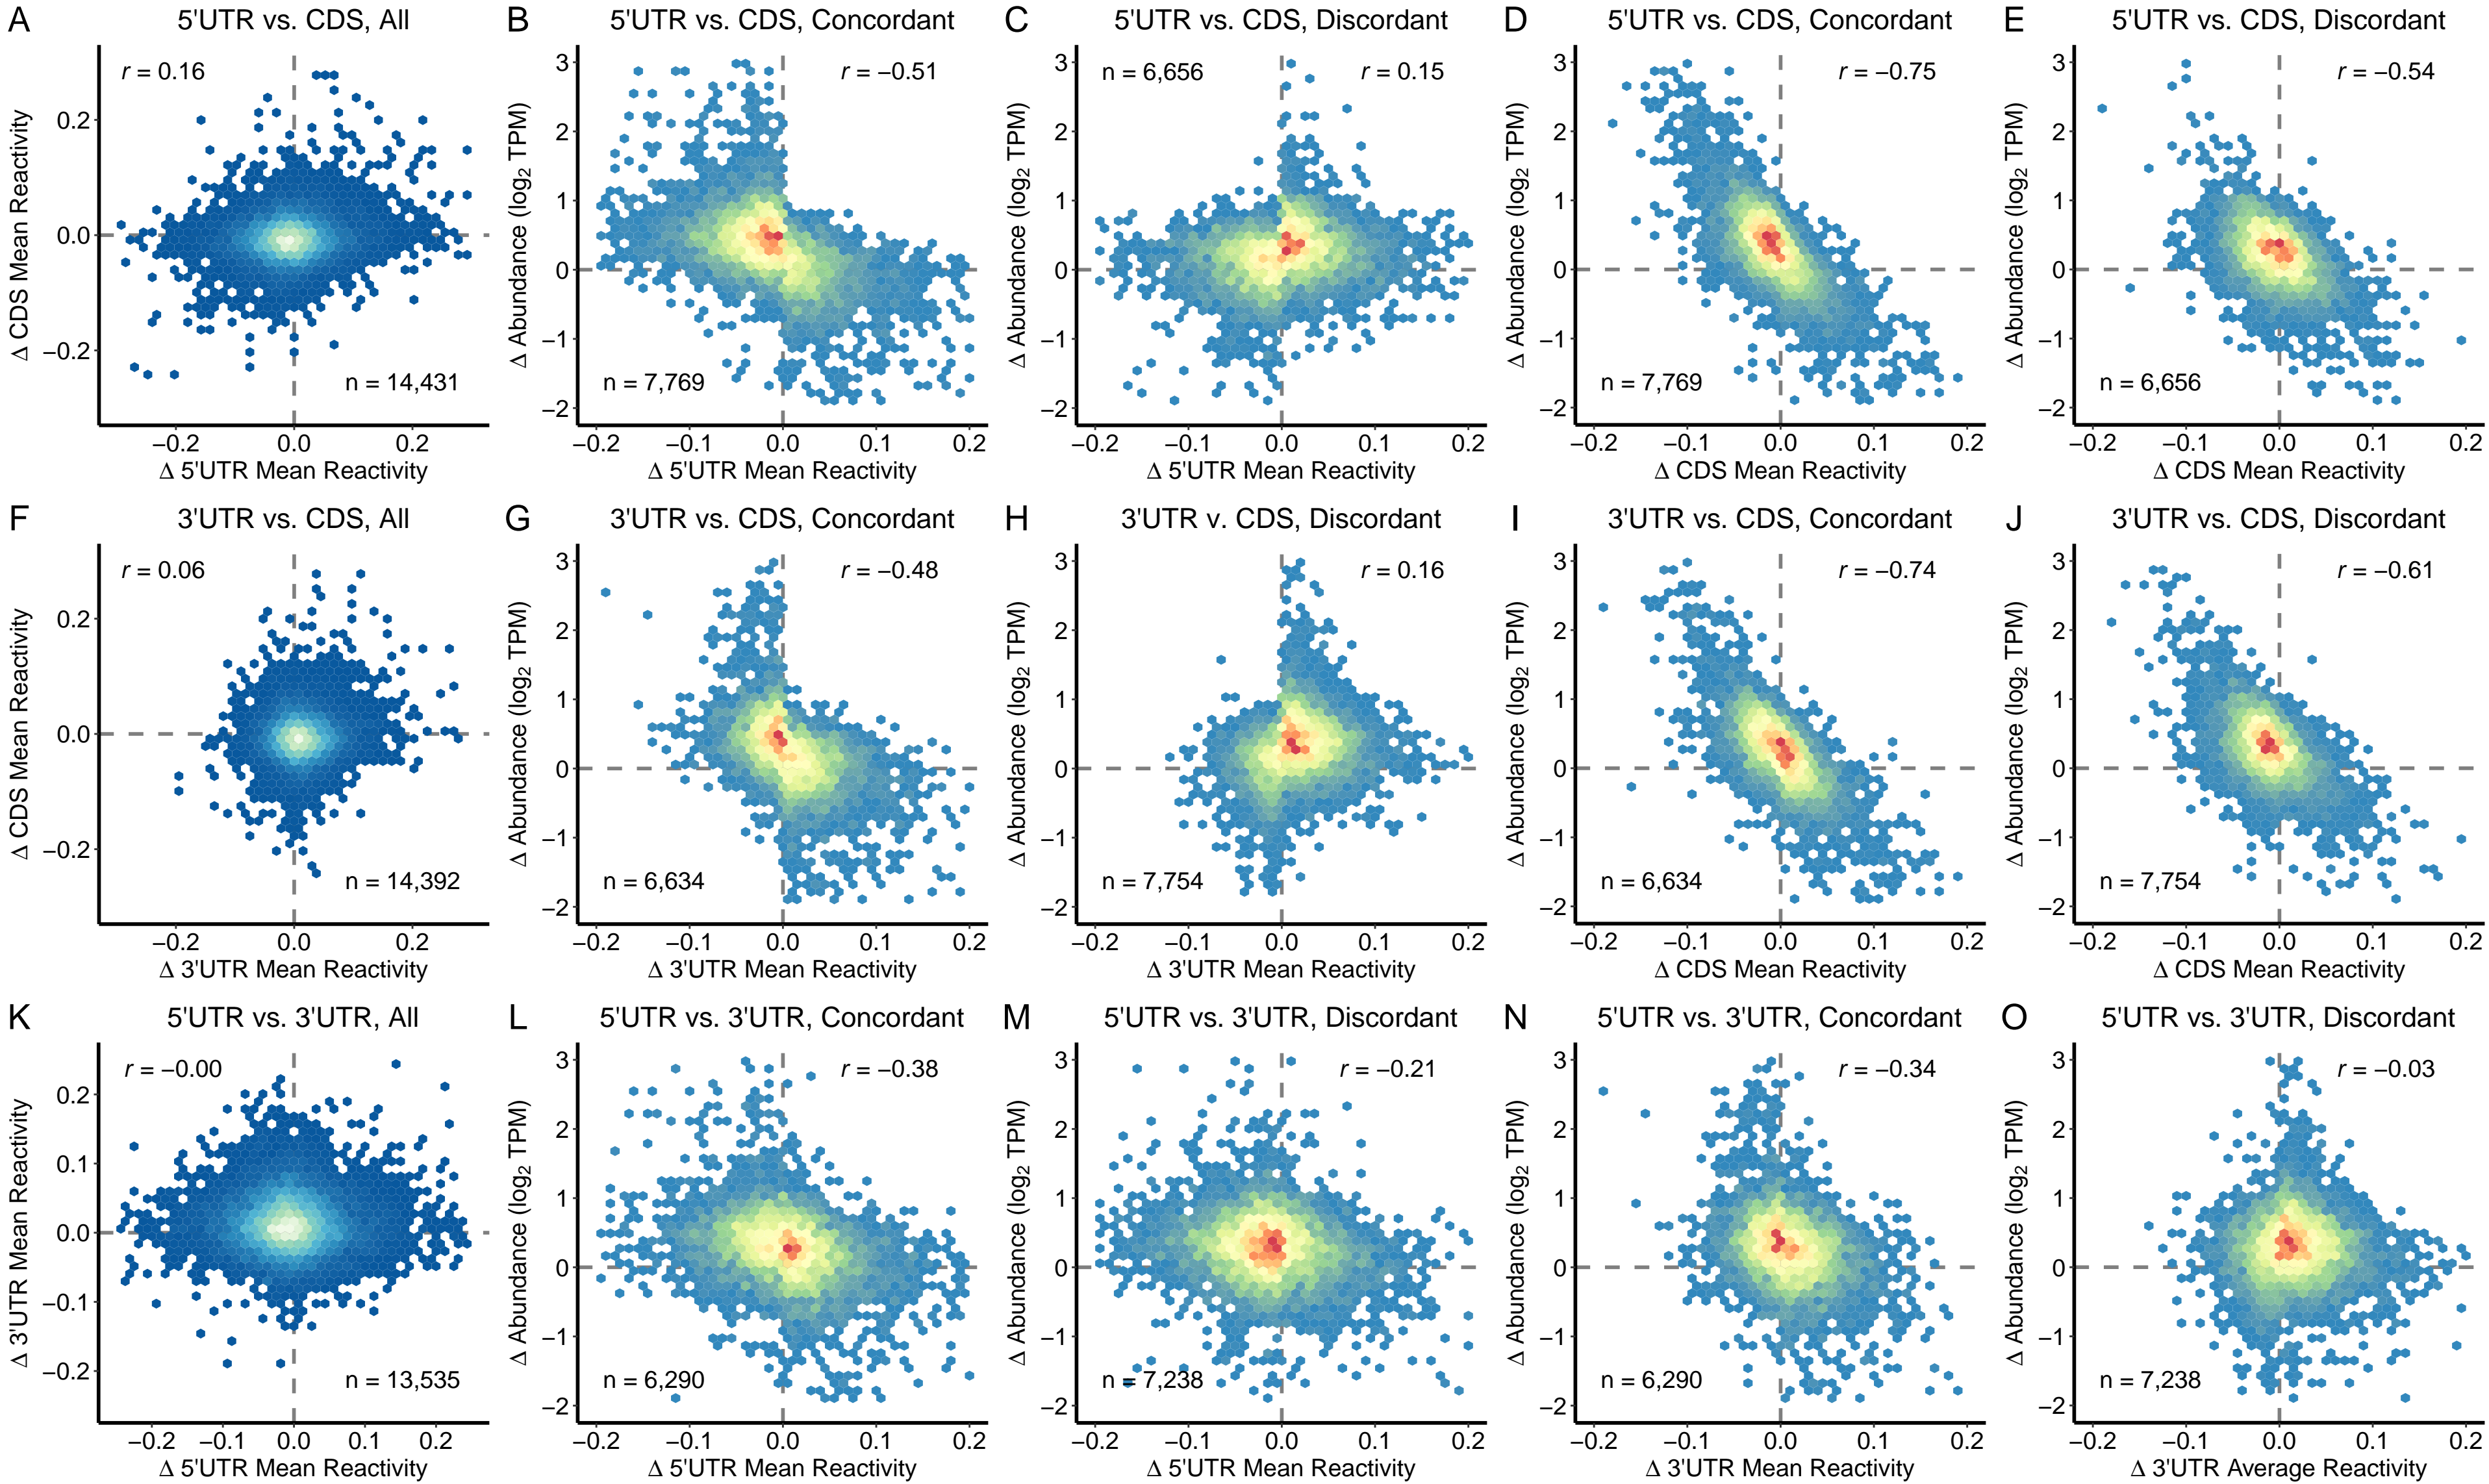

Supplement: supp_072850.119_Supplemental_Figure_8.pdf [file supp_072850.119_Supplemental_Figure_8.pdf]

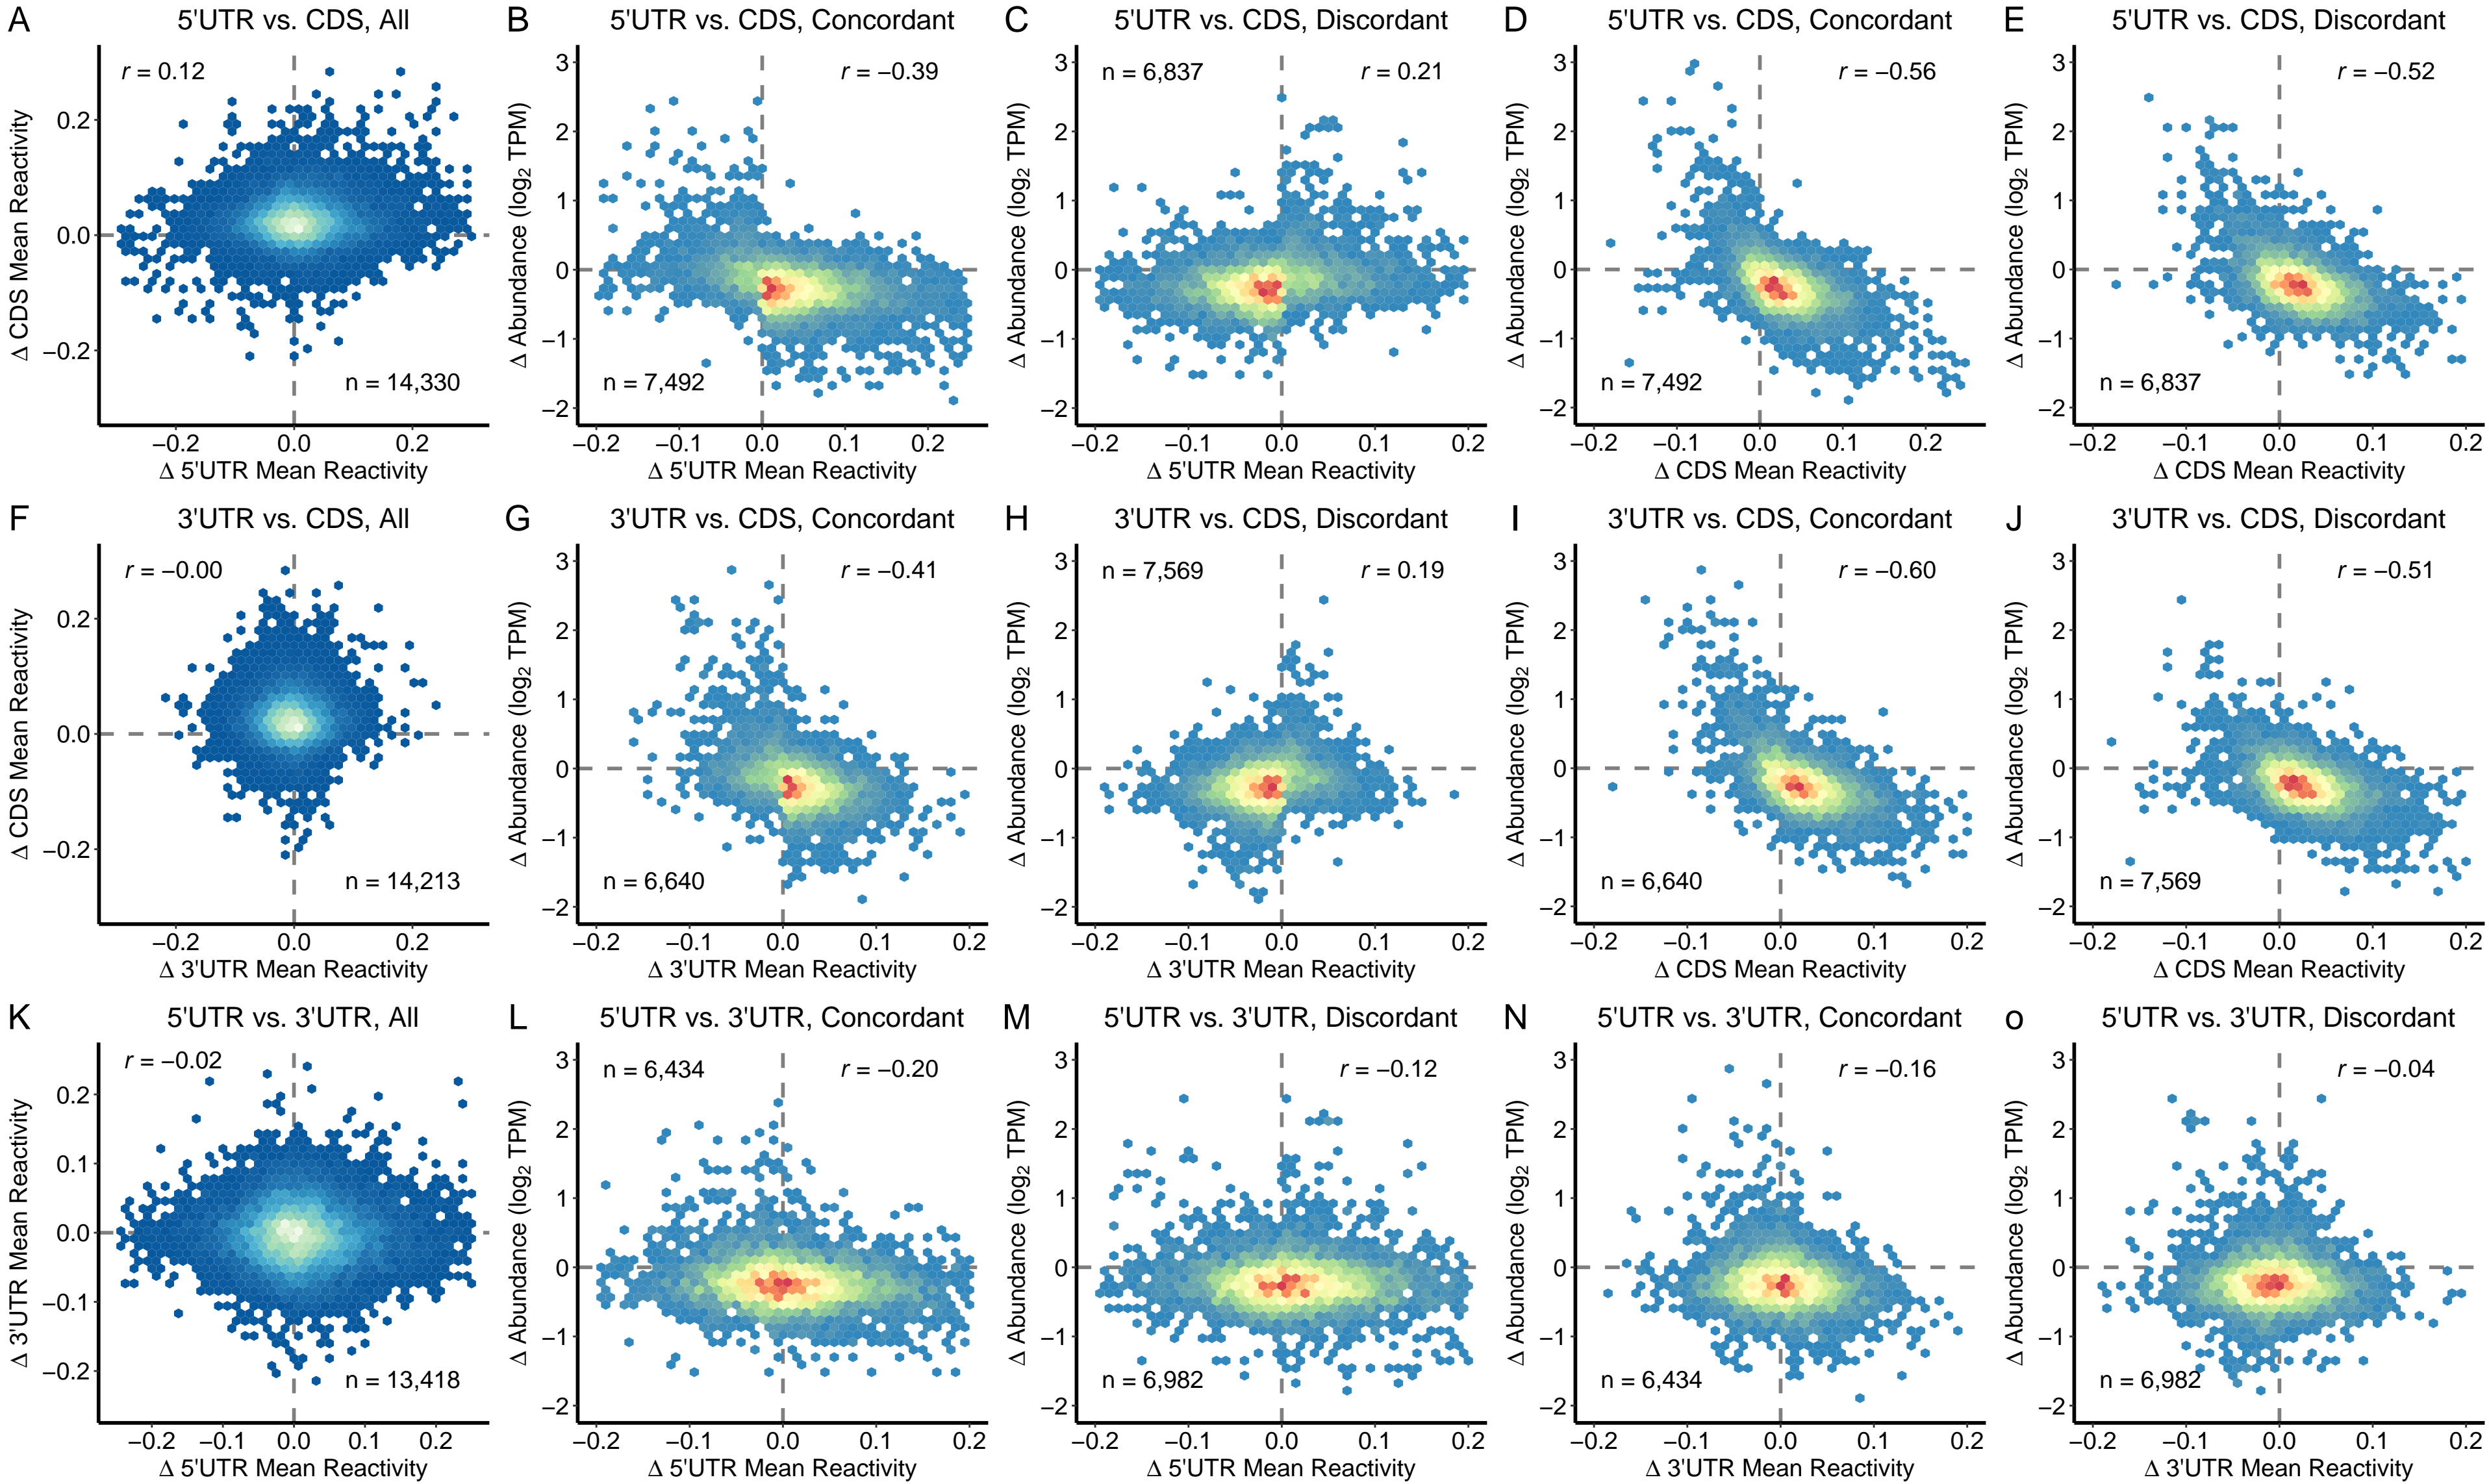

Supplement: supp_072850.119_Supplemental_Figure_9.pdf [file supp_072850.119_Supplemental_Figure_9.pdf]
